# Supplementary material for: DeepPROTACs is a deep learning-based targeted degradation predictor for PROTACs
Source: PubMed Central journal article supplement (PMC9681730; doi:10.1038/s41467-022-34807-3), 2022-11-21

## Supplementary Information

### DeepPROTACs - a deep learning-based targeted degradation predictor for PROTACs

Fenglei Li<sup>a,b,1</sup>, Qiaoyu Hu<sup>a,1</sup>, Xianglei Zhang<sup>a,1</sup>, Renhong Sun<sup>c,1</sup>, Zhuanghua Liu<sup>b,1</sup>,  
Sanan Wu<sup>a</sup>, Siyuan Tian<sup>a,d</sup>, Xinyue Ma<sup>a,b</sup>, Zhizhuo Dai<sup>d</sup>, Xiaobao Yang<sup>c,\*</sup>, Shenghua  
Gao<sup>b,\*</sup>, and Fang Bai<sup>a,b,d,e\*</sup>

<sup>a</sup>*Shanghai Institute for Advanced Immunochemical Studies, ShanghaiTech University,  
393 Middle Huaxia Road, Shanghai 201210, China*

<sup>b</sup>*School of Information Science and Technology, ShanghaiTech University,  
393 Middle Huaxia Road, Shanghai 201210, China*

<sup>c</sup>*Gluetacs Therapeutics (Shanghai) Co., Ltd.,  
99 Haik Road, Zhangjiang Hi-Tech Park, Shanghai 201210, China*

<sup>d</sup>*School of Life Science and Technology, ShanghaiTech University,  
393 Middle Huaxia Road, Shanghai 201210, China*

<sup>e</sup>*Shanghai Clinical Research and Trial Center, Shanghai 201210, China.*

<sup>1</sup>*These authors contributed equally*

\* To whom correspondence should be addressed to

Fang Bai: [baifang@shanghaitech.edu.cn](mailto:baifang@shanghaitech.edu.cn),

or Shenghua Gao: [gaoshh@shanghaitech.edu.cn](mailto:gaoshh@shanghaitech.edu.cn),

or Xiaobao Yang: [yang.xiaobao@gluetacs.com](mailto:yang.xiaobao@gluetacs.com).

---

## Contents of Supporting Information

| <b>Contents:</b>                                  | <b>Page</b> |
|---------------------------------------------------|-------------|
| Synthesis of toremifene derivative                | S3-4        |
| General procedure for the synthesis of ER PROTACs | S5          |
| Characterization data of ER PROTACs               | S6-16       |
| Synthesis and characterization of PROTAC 8N       | S17         |
| Supplementary Tables                              | S18-S25     |
| Supplementary Figures                             | S26-S55     |

---

## 1. Synthesis of toremifene derivative.

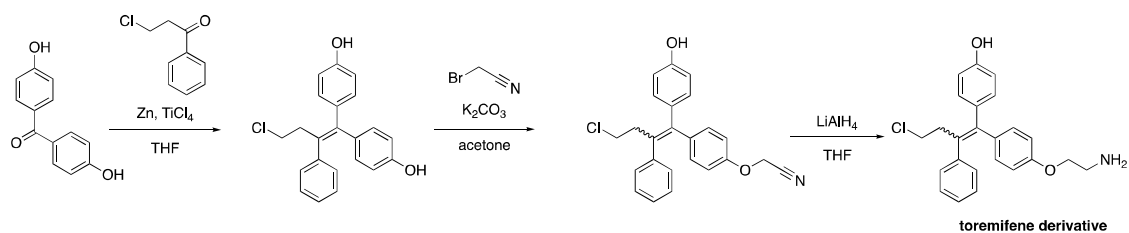

### Step 1: The preparation of 4,4'-(4-chloro-2-phenylbut-1-ene-1,1-diyl)diphenol

A suspension of Zinc (6.5 g, 100 mmol) in THF was purged and refilled with N<sub>2</sub> for three times. Then TiCl<sub>4</sub> (9.5 g, 50 mmol) was added dropwise at 0°C. After the addition was completed, the resulting mixture was refluxed for 2 h, followed by the addition of the solution of bis(4-hydroxyphenyl)methanone (2.14 g, 10 mmol) and 3-chloro-1-phenylpropan-1-one (5.1 g, 30 mmol) in THF (80 mL). Then the mixture was refluxed in the dark for another 3 h. TLC showed the reaction was complete. The reaction mixture was cooled to room temperature, concentrated in vacuo to remove most of the solvent, and then quenched with sat. NH<sub>4</sub>Cl aq. and extracted with ethyl acetate. The combined organic layers were washed with water and brine, dried over anhydrous Na<sub>2</sub>SO<sub>4</sub>, filtered and concentrated in vacuo. The residue was purified by flash column chromatography (eluent: with 0%-30% (v1: v2) ethyl acetate in hexane) to afford the desired product as a yellow solid (3.0 g, 86% yield). <sup>1</sup>H NMR (500 MHz, CDCl<sub>3</sub>) δ 7.21 – 7.10 (m, 7H), 6.84 – 6.81 (m, 2H), 6.75 – 6.72 (m, 2H), 6.49 – 6.46 (m, 2H), 4.99 (s, 1H), 4.73 (s, 1H), 3.45 – 3.36 (m, 2H), 2.99 – 2.91 (m, 2H). HRMS (ESI) m/z: calcd for C<sub>22</sub>H<sub>20</sub>ClO<sub>2</sub><sup>+</sup> [M + H]<sup>+</sup>, 351.1146; found, 351.1138.

### Step 2: The preparation of 2-(4-(4-chloro-1-(4-hydroxyphenyl)-2-phenylbut-1-en-1-yl)phenoxy)acetonitrile

A solution of 4,4'-(4-chloro-2-phenylbut-1-ene-1,1-diyl)diphenol (1.5 g, 4.28 mmol), K<sub>2</sub>CO<sub>3</sub> (592 mg, 4.28 mmol) and 2-bromoacetonitrile (257 mg, 2.14 mmol) in acetone was purged and refilled with N<sub>2</sub> for three times, then was refluxed for 3.5 h. TLC showed the reaction was complete. The reaction mixture was cooled to room temperature and

concentrated in vacuo. The residue was purified by flash column chromatography (eluent: DCM) to afford the desired product as a light yellow oil (782 mg, 94% yield). <sup>1</sup>H NMR (500 MHz, CDCl<sub>3</sub>) δ 7.31 – 7.27 (m, 1H), 7.21-7.18 (m, 2H), 7.17 – 7.14 (m, 2H), 7.13-7.10 (m, 2H), 7.00 – 6.97 (m, 1H), 6.86-6.83 (m, 2H), 6.75 – 6.70 (m, 1H), 6.65 – 6.61 (m, 1H), 6.51 – 6.47 (m, 1H), 4.81 (s, 1H), 4.64 (s, 1H), 3.45 – 3.39 (m, 2H), 2.97-2.91 (m, 2H). HRMS (ESI) m/z: calcd for C<sub>24</sub>H<sub>21</sub>ClNO<sub>2</sub><sup>+</sup> [M + H]<sup>+</sup>, 390.1255; found, 390.1263.

**Step 3: The preparation of toremifene derivative 4-(1-(4-(2-aminoethoxy)phenyl)-4-chloro-2-phenylbut-1-en-1-yl)phenol**

To a solution of 2-(4-(4-chloro-1-(4-hydroxyphenyl)-2-phenylbut-1-en-1-yl)phenoxy)acetonitrile (782 mg, 2 mmol) in THF (25 mL) cooled to 0°C was added LiAlH<sub>4</sub> (228 mg, 6 mmol) in portions. The resulting mixture was purged and refilled with N<sub>2</sub> for three times, then stirred at room temperature overnight. After the reaction was complete, the reaction mixture was quenched with sat. NH<sub>4</sub>Cl aq. and concentrated in vacuo. The residue was dissolved with MeOH and filtered. The filtrate was concentrated and purified by reverse ISCO (eluent: with 10%-100% (v1: v2) acetonitrile in water (containing 0.05% HCl)) to afford the desired product as a light yellow solid (473 mg, 60% yield). <sup>1</sup>H NMR (500 MHz, DMSO-*d*<sub>6</sub>) δ 9.68 – 9.17 (m, 1H), 8.12 (d, *J* = 41.4 Hz, 3H), 7.24 – 7.18 (m, 3H), 7.16 – 7.12 (m, 3H), 7.06 (d, *J* = 8.5 Hz, 1H), 7.00 (d, *J* = 8.7 Hz, 1H), 6.77 (t, *J* = 8.4 Hz, 2H), 6.65 (d, *J* = 8.8 Hz, 1H), 6.61 (d, *J* = 8.6 Hz, 1H), 6.42 (d, *J* = 8.6 Hz, 1H), 4.20 (t, *J* = 4.9 Hz, 1H), 4.03 (t, *J* = 4.9 Hz, 1H), 3.43 (t, *J* = 7.3 Hz, 2H), 3.23 (s, 1H), 3.12 (s, 1H), 2.93 – 2.83 (m, 2H). HRMS (ESI) m/z: calcd for C<sub>24</sub>H<sub>25</sub>ClNO<sub>2</sub><sup>+</sup> [M + H]<sup>+</sup>, 394.1568; found, 394.1561.



### 3. Characterization data of ER PROTACs.

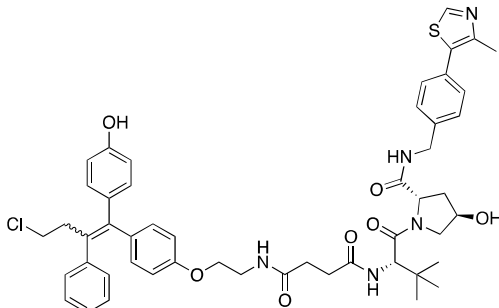

**N1-(2-(4-(4-chloro-1-(4-hydroxyphenyl)-2-phenylbut-1-en-1-yl)phenoxy)ethyl)-N4-((S)-1-((2S,4R)-4-hydroxy-2-((4-(4-methylthiazol-5-yl)benzyl)carbamoyl)pyrrolidin-1-yl)-3,3-dimethyl-1-oxobutan-2-yl)succinamide (PROTAC 1).** (white solid, 6.8 mg, 30% yield)  $^1\text{H NMR}$  (500 MHz, Methanol- $d_4$ )  $\delta$  8.98 (s, 1H), 7.47 (d,  $J = 8.3$  Hz, 2H), 7.44-7.41 (m, 2H), 7.23 – 7.06 (m, 7H), 6.95 (d,  $J = 8.7$  Hz, 1H), 6.79-6.76 (m, 2H), 6.68 – 6.64 (m, 1H), 6.57 (d,  $J = 8.8$  Hz, 1H), 6.43 – 6.38 (m, 1H), 4.62 – 4.44 (m, 4H), 4.35 (d,  $J = 15.5$  Hz, 1H), 4.07 (t,  $J = 5.5$  Hz, 1H), 3.90-3.85 (m, 2H), 3.79 – 3.72 (m, 1H), 3.60-3.56 (m, 1H), 3.48-3.45 (m, 1H), 3.42-3.39 (m, 2H), 2.97 – 2.88 (m, 2H), 2.65 – 2.42 (m, 7H), 2.22-2.19 (m, 1H), 2.12 – 2.02 (m, 1H), 1.02-0.99 (m, 9H). HRMS (ESI)  $m/z$ : calcd for  $\text{C}_{50}\text{H}_{57}\text{ClN}_5\text{O}_7\text{S}^+ [\text{M} + \text{H}]^+$ , 906.3662; found, 906.3672.

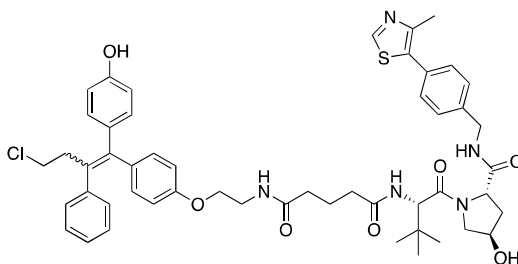

**N1-(2-(4-(4-chloro-1-(4-hydroxyphenyl)-2-phenylbut-1-en-1-yl)phenoxy)ethyl)-N5-((S)-1-((2S,4R)-4-hydroxy-2-((4-(4-methylthiazol-5-yl)benzyl)carbamoyl)pyrrolidin-1-yl)-3,3-dimethyl-1-oxobutan-2-yl)glutaramide (PROTAC 2).** (white solid, 5.2 mg, 22% yield)  $^1\text{H NMR}$  (500 MHz, Methanol- $d_4$ )  $\delta$  9.47 (d,  $J = 5.4$  Hz, 1H), 7.52 (d,  $J = 7.3$  Hz,

2H), 7.48 – 7.44 (m, 2H), 7.20 – 7.06 (m, 7H), 6.94 (d,  $J = 8.7$  Hz, 1H), 6.80 – 6.74 (m, 2H), 6.68 – 6.63 (m, 1H), 6.58 – 6.53 (m, 1H), 6.43 – 6.37 (m, 1H), 4.61 – 4.47 (m, 4H), 4.35 (dd,  $J = 14.9, 7.1$  Hz, 1H), 4.08 (t,  $J = 5.5$  Hz, 1H), 3.95 – 3.88 (m, 2H), 3.82 – 3.76 (m, 1H), 3.61-3.57 (m, 1H), 3.52 – 3.43 (m, 1H), 3.42-3.38 (m, 2H), 2.94 – 2.89 (m, 2H), 2.56 – 2.49 (m, 3H), 2.34 – 2.16 (m, 5H), 2.11 – 2.04 (m, 1H), 1.96 – 1.82 (m, 2H), 1.03-0.99 (m, 9H). HRMS (ESI)  $m/z$ : calcd for  $C_{51}H_{59}ClN_5O_7S^+$   $[M + H]^+$ , 920.3818; found, 920.3811.

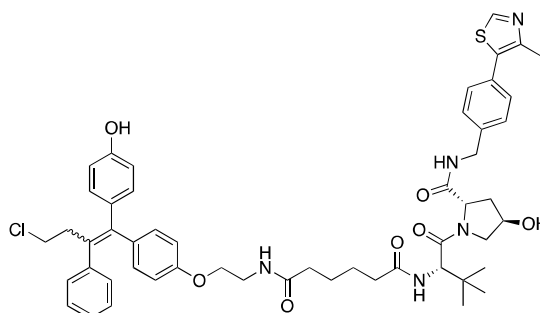

**N1-(2-(4-(4-chloro-1-(4-hydroxyphenyl)-2-phenylbut-1-en-1-yl)phenoxy)ethyl)-N6-((S)-1-((2S,4R)-4-hydroxy-2-((4-(4-methylthiazol-5-yl)benzyl)carbamoyl)pyrro-lidin-1-yl)-3,3-dimethyl-1-oxobutan-2-yl)adipamide (PROTAC 3).** (white solid, 7.5 mg, 32% yield)  $^1H$  NMR (500 MHz, Methanol- $d_4$ )  $\delta$  9.40 (d,  $J = 5.5$  Hz, 1H), 7.54 – 7.49 (m, 2H), 7.46 (d,  $J = 8.3$  Hz, 2H), 7.21 – 7.05 (m, 7H), 6.95 (d,  $J = 8.7$  Hz, 1H), 6.77 (dd,  $J = 8.6, 6.6$  Hz, 2H), 6.67-6.65 (m, 1H), 6.57 (d,  $J = 8.8$  Hz, 1H), 6.41 (d,  $J = 8.6$  Hz, 1H), 4.65 – 4.45 (m, 4H), 4.37 (d,  $J = 15.6$  Hz, 1H), 4.07 (t,  $J = 5.4$  Hz, 1H), 3.90 (t,  $J = 5.4$  Hz, 2H), 3.82 – 3.72 (m, 1H), 3.58 (t,  $J = 5.5$  Hz, 1H), 3.46 (dd,  $J = 10.8, 5.2$  Hz, 1H), 3.40 (t,  $J = 7.5$  Hz, 2H), 2.95-2.88 (m, 2H), 2.52 (d,  $J = 5.3$  Hz, 3H), 2.37 – 2.14 (m, 5H), 2.12 – 2.02 (m, 1H), 1.61 (d,  $J = 20.4$  Hz, 4H), 1.02-1.00 (m, 9H). HRMS (ESI)  $m/z$ : calcd for  $C_{52}H_{61}ClN_5O_7S^+$   $[M + H]^+$ , 934.3975; found, 934.3975.

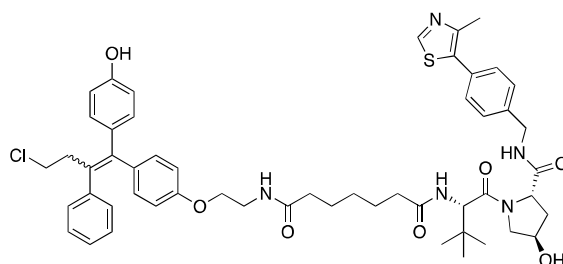

**N1-(2-(4-(4-chloro-1-(4-hydroxyphenyl)-2-phenylbut-1-en-1-yl)phenoxy)ethyl)-N7-((S)-1-((2S,4R)-4-hydroxy-2-((4-(4-methylthiazol-5-yl)benzyl)carbamoyl)pyrro-lidin-1-yl)-3,3-dimethyl-1-oxobutan-2-yl)heptanediamide (PROTAC 4).** (white solid, 8.1 mg, 34% yield)  $^1\text{H}$  NMR (500 MHz, Methanol- $d_4$ )  $\delta$  8.95 (s, 1H), 7.47 (d,  $J = 8.3$  Hz, 2H), 7.43 – 7.39 (m, 2H), 7.21 – 7.06 (m, 7H), 6.95 (d,  $J = 8.7$  Hz, 1H), 6.80 – 6.75 (m, 2H), 6.68 – 6.64 (m, 1H), 6.59 – 6.55 (m, 1H), 6.43 – 6.39 (m, 1H), 4.62 (d,  $J = 2.5$  Hz, 1H), 4.58-4.49 (m, 3H), 4.35 (d,  $J = 15.5$  Hz, 1H), 4.07 (t,  $J = 5.5$  Hz, 1H), 3.93 – 3.87 (m, 2H), 3.81 – 3.76 (m, 1H), 3.60 – 3.55 (m, 1H), 3.46 (t,  $J = 5.6$  Hz, 1H), 3.41-3.38 (m, 2H), 2.95-2.86 (m, 2H), 2.47 (s, 3H), 2.29-2.15 (m Hz, 5H), 2.11-2.03 (m, 1H), 1.68 – 1.54 (m, 4H), 1.38 – 1.32 (m, 2H), 1.02-1.00 (m, 9H). HRMS (ESI)  $m/z$ : calcd for  $\text{C}_{53}\text{H}_{63}\text{ClN}_5\text{O}_7\text{S}^+$  [ $\text{M} + \text{H}$ ] $^+$ , 948.4131; found, 948.4137.

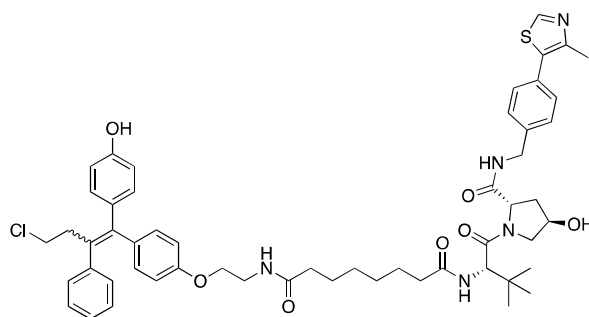

**N1-(2-(4-(4-chloro-1-(4-hydroxyphenyl)-2-phenylbut-1-en-1-yl)phenoxy)ethyl)-N8-((S)-1-((2S,4R)-4-hydroxy-2-((4-(4-methylthiazol-5-yl)benzyl)carbamoyl)pyrro-lidin-1-yl)-3,3-dimethyl-1-oxobutan-2-yl)octanediamide (PROTAC 5).** (white solid, 8.4 mg, 34% yield)  $^1\text{H}$  NMR (500 MHz, Methanol- $d_4$ )  $\delta$  9.20 (s, 1H), 7.49 (d,  $J = 8.1$  Hz, 2H), 7.46-7.43 (m, 2H), 7.21 – 7.05 (m, 7H), 6.95-6.91 (m, 1H), 6.79-6.76 (m, 2H), 6.68 – 6.62



(m, 1H), 6.57-6.53 (m, 1H), 6.43 – 6.37 (m, 1H), 4.63 (s, 1H), 4.60 – 4.47 (m, 3H), 4.39 – 4.32 (m, 1H), 4.08-4.05 (m, 1H), 3.95 – 3.85 (m, 2H), 3.79 (dd,  $J = 11.0, 3.8$  Hz, 1H), 3.58-3.54 (m, 1H), 3.46 (t,  $J = 5.4$  Hz, 1H), 3.40 (t,  $J = 7.4$  Hz, 2H), 2.95-2.88 (m, 2H), 2.50 (s, 3H), 2.30 – 2.13 (m, 5H), 2.10-2.03 (m, 1H), 1.61-1.57 (m, 4H), 1.36 – 1.27 (m, 4H), 1.03-1.00 (m, 9H). HRMS (ESI)  $m/z$ : calcd for  $C_{54}H_{65}ClN_5O_7S^+$   $[M + H]^+$ , 962.4288; found, 962.4280.

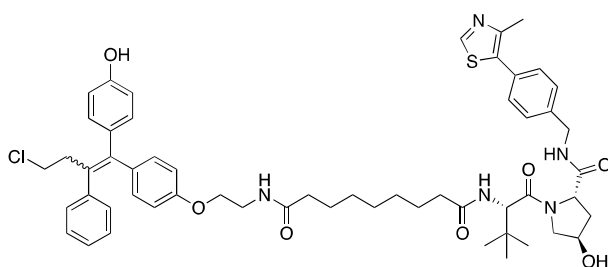

**N1-(2-(4-(4-chloro-1-(4-hydroxyphenyl)-2-phenylbut-1-en-1-yl)phenoxy)ethyl)-N9-((S)-1-((2S,4R)-4-hydroxy-2-((4-(4-methylthiazol-5-yl)benzyl)carbamoyl)pyrrolidin-1-yl)-3,3-dimethyl-1-oxobutan-2-yl)nonanediamide (PROTAC 6).** (white solid, 9.7 mg, 40% yield)  $^1H$  NMR (500 MHz, Methanol- $d_4$ )  $\delta$  9.31 (s, 1H), 7.51 (d,  $J = 8.2$  Hz, 2H), 7.48 – 7.43 (m, 2H), 7.21 – 7.06 (m, 7H), 6.96 – 6.91 (m, 1H), 6.80 – 6.74 (m, 2H), 6.69 – 6.64 (m, 1H), 6.58 – 6.53 (m, 1H), 6.43 – 6.38 (m, 1H), 4.63 (s, 1H), 4.61 – 4.46 (m, 3H), 4.37 (d,  $J = 15.6$  Hz, 1H), 4.06 (t,  $J = 5.4$  Hz, 1H), 3.92-3.88 (m, 2H), 3.80 (dd,  $J = 10.9, 3.8$  Hz, 1H), 3.56 (t,  $J = 5.4$  Hz, 1H), 3.46 (t,  $J = 5.4$  Hz, 1H), 3.40 (t,  $J = 7.4$  Hz, 2H), 2.95-2.89 (m, 2H), 2.52 (s, 3H), 2.32 – 2.12 (m, 5H), 2.10-2.02 (m, 1H), 1.67 – 1.51 (m, 4H), 1.37 – 1.23 (m, 6H), 1.03-1.00 (m, 9H). HRMS (ESI)  $m/z$ : calcd for  $C_{55}H_{67}ClN_5O_7S^+$   $[M + H]^+$ , 976.4444; found, 976.4441.

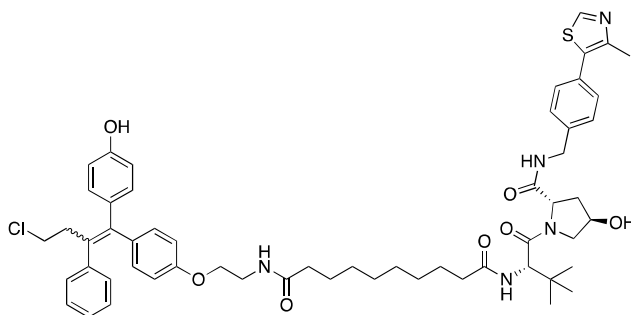

**N1-(2-(4-(4-chloro-1-(4-hydroxyphenyl)-2-phenylbut-1-en-1-yl)phenoxy)ethyl)-N10-((S)-1-((2S,4R)-4-hydroxy-2-((4-(4-methylthiazol-5-yl)benzyl)carbamoyl)pyrro-lidin-1-yl)-3,3-dimethyl-1-oxobutan-2-yl)decanediamide (PROTAC 7).** (white solid, 9.0 mg, 36% yield)  $^1\text{H NMR}$  (500 MHz, Methanol- $d_4$ )  $\delta$  9.23 (s, 1H), 7.50 (d,  $J = 8.3$  Hz, 2H), 7.44 (d,  $J = 8.3$  Hz, 2H), 7.22 – 7.06 (m, 7H), 6.96 – 6.91 (m, 1H), 6.82 – 6.74 (m, 2H), 6.68 – 6.63 (m, 1H), 6.58 – 6.53 (m, 1H), 6.44 – 6.37 (m, 1H), 4.63 (s, 1H), 4.60 – 4.47 (m, 3H), 4.36 (d,  $J = 15.6$  Hz, 1H), 4.07 (t,  $J = 5.4$  Hz, 1H), 3.89 (t,  $J = 9.4$  Hz, 2H), 3.80 (dd,  $J = 11.0, 3.8$  Hz, 1H), 3.57 (t,  $J = 5.4$  Hz, 1H), 3.46 (t,  $J = 5.4$  Hz, 1H), 3.40 (t,  $J = 7.4$  Hz, 2H), 2.95-2.89 (m, 2H), 2.51 (s, 3H), 2.31 – 2.12 (m, 5H), 2.10-2.04 (m, 1H), 1.65 – 1.52 (m, 4H), 1.29-1.27 (m, 8H), 1.03-1.01 (m, 9H). HRMS (ESI)  $m/z$ : calcd for  $\text{C}_{56}\text{H}_{69}\text{ClN}_5\text{O}_7\text{S}^+$   $[\text{M} + \text{H}]^+$ , 990.4601; found, 990.4611.

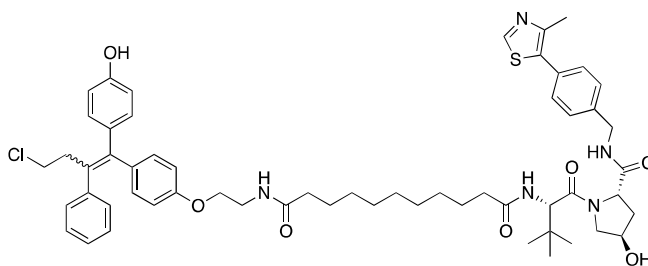

**N1-(2-(4-(4-chloro-1-(4-hydroxyphenyl)-2-phenylbut-1-en-1-yl)phenoxy)ethyl)-N11-((S)-1-((2S,4R)-4-hydroxy-2-((4-(4-methylthiazol-5-yl)benzyl)carbamoyl)pyrro-lidin-1-yl)-3,3-dimethyl-1-oxobutan-2-yl)undecanediamide (PROTAC 8).** (white solid, 9.6 mg, 38% yield)  $^1\text{H NMR}$  (500 MHz, Methanol- $d_4$ )  $\delta$  9.15 (s, 1H), 7.49 (d,  $J = 8.3$  Hz, 2H), 7.46-7.43 (m, 2H), 7.22 – 7.05 (m, 7H), 6.94 (d,  $J = 8.7$  Hz, 1H), 6.78 (dd,  $J = 9.6, 8.8$  Hz,

2H), 6.66 (d,  $J = 8.7$  Hz, 1H), 6.60 – 6.52 (m, 1H), 6.45 – 6.38 (m, 1H), 4.63 (s, 1H), 4.60 – 4.47 (m, 3H), 4.36 (d,  $J = 15.6$  Hz, 1H), 4.07 (t,  $J = 5.4$  Hz, 1H), 3.92-3.88 (m, 2H), 3.80 (dd,  $J = 10.5, 3.2$  Hz, 1H), 3.58-3.55(m, 1H), 3.46 (t,  $J = 5.4$  Hz, 1H), 3.40 (t,  $J = 7.4$  Hz, 2H), 2.92 (dt,  $J = 11.9, 7.5$  Hz, 2H), 2.50 (s, 3H), 2.32 – 2.12 (m, 5H), 2.10-2.05 (m, 1H), 1.59-1.57 (m, 4H), 1.28 (d,  $J = 9.2$  Hz, 10H), 1.03-1.01 (m, 9H). HRMS (ESI)  $m/z$ : calcd for  $C_{57}H_{71}ClN_5O_7S^+$   $[M + H]^+$ , 1004.4757; found, 1004.4761.

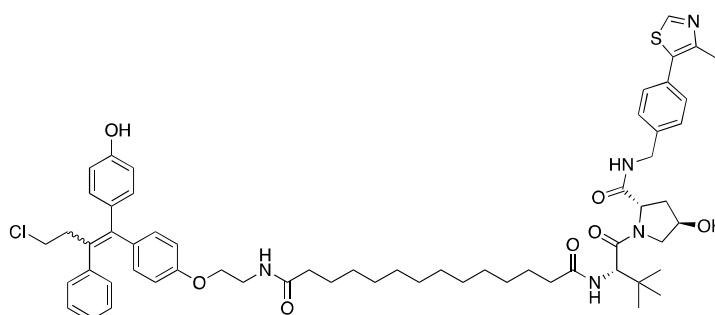

**N1-(2-(4-(4-chloro-1-(4-hydroxyphenyl)-2-phenylbut-1-en-1-yl)phenoxy)ethyl)-N14-((S)-1-((2S,4R)-4-hydroxy-2-((4-(4-methylthiazol-5-yl)benzyl)carbamoyl)pyrrolidin-1-yl)-3,3-dimethyl-1-oxobutan-2-yl)tetradecanediamide (PROTAC 9).** (white solid, 10.2 mg, 38% yield)  $^1H$  NMR (500 MHz, Methanol- $d_4$ )  $\delta$  9.23 (s, 1H), 7.50 (d,  $J = 8.2$  Hz, 2H), 7.47-7.44 (m, 2H), 7.22 – 7.15 (m, 3H), 7.15 – 7.08 (m, 4H), 6.97 – 6.91 (m, 1H), 6.81 – 6.74 (m, 2H), 6.66 (d,  $J = 8.7$  Hz, 1H), 6.58-6.55 (m, 1H), 6.41 (d,  $J = 8.6$  Hz, 1H), 4.63 (s, 1H), 4.61 – 4.46 (m, 3H), 4.36 (d,  $J = 15.6$  Hz, 1H), 4.07 (t,  $J = 5.4$  Hz, 1H), 3.92-3.89 (m, 2H), 3.80 (dd,  $J = 11.0, 3.8$  Hz, 1H), 3.58-3.55 (m, 1H), 3.47 (t,  $J = 5.4$  Hz, 1H), 3.40 (t,  $J = 7.4$  Hz, 2H), 2.92 (dt,  $J = 11.9, 7.5$  Hz, 2H), 2.51 (s, 3H), 2.31-2.22 (m, 5H), 2.21-2.03 (m, 1H), 1.63 – 1.54 (m, 4H), 1.28 (d,  $J = 13.1$  Hz, 16H), 1.11 – 0.85 (m, 9H). HRMS (ESI)  $m/z$ : calcd for  $C_{60}H_{77}ClN_5O_7S^+$   $[M + H]^+$ , 1046.5227; found, 1046.5224.

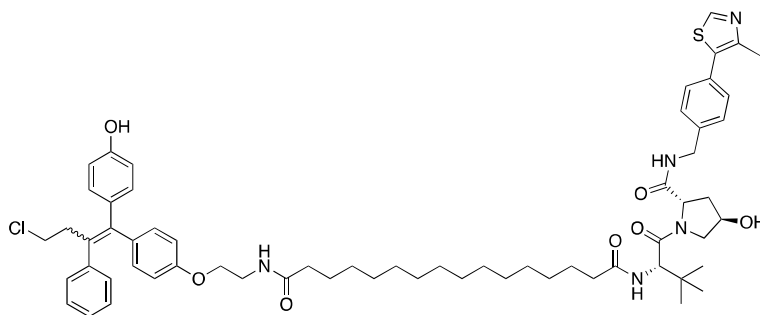

**N1-(2-(4-(4-chloro-1-(4-hydroxyphenyl)-2-phenylbut-1-en-1-yl)phenoxy)ethyl)-N16-((S)-1-((2S,4R)-4-hydroxy-2-((4-(4-methylthiazol-5-yl)benzyl)carbamoyl)pyrrolidin-1-yl)-3,3-dimethyl-1-oxobutan-2-yl)hexadecanediamide (PROTAC 10).** (white solid, 12.1 mg, 44% yield)  $^1\text{H NMR}$  (500 MHz, Methanol- $d_4$ )  $\delta$  9.01 (s, 1H), 7.48 (d,  $J = 8.2$  Hz, 2H), 7.45-7.42 (m, 2H), 7.23 – 7.07 (m, 7H), 6.94 (d,  $J = 8.7$  Hz, 1H), 6.82 – 6.74 (m, 2H), 6.66 (d,  $J = 8.7$  Hz, 1H), 6.56 (d,  $J = 8.8$  Hz, 1H), 6.41 (d,  $J = 8.7$  Hz, 1H), 4.63 (s, 1H), 4.58-4.50 (m, 3H), 4.36 (d,  $J = 15.5$  Hz, 1H), 4.08 (t,  $J = 5.3$  Hz, 1H), 3.92-3.89 (m, 2H), 3.80 (dd,  $J = 10.9, 3.9$  Hz, 1H), 3.57 (t,  $J = 5.3$  Hz, 1H), 3.48-3.45 (m, 1H), 3.40 (t,  $J = 7.4$  Hz, 2H), 2.93 (dt,  $J = 11.9, 7.5$  Hz, 2H), 2.49 (s, 3H), 2.32 – 2.13 (m, 5H), 2.11-2.03 (m, 1H), 1.60-1.56 (m, 4H), 1.27 (d,  $J = 14.9$  Hz, 20H), 1.03-1.01 (m, 9H). HRMS (ESI)  $m/z$ : calcd for  $\text{C}_{62}\text{H}_{81}\text{ClN}_5\text{O}_7\text{S}^+ [\text{M} + \text{H}]^+$ , 1074.5540; found, 1074.5539.

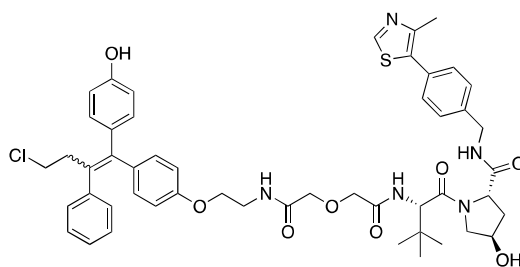

**(2S,4R)-1-((S)-2-(2-(2-((2-(4-(4-chloro-1-(4-hydroxyphenyl)-2-phenylbut-1-en-1-yl)phenoxy)ethyl)amino)-2-oxoethoxy)acetamido)-3,3-dimethylbutanoyl)-4-hydroxy-N-(4-(4-methylthiazol-5-yl)benzyl)pyrrolidine-2-carboxamide (PROTAC 11).** (white solid, 6.4 mg, 28% yield)  $^1\text{H NMR}$  (500 MHz, Methanol- $d_4$ )  $\delta$  9.13 – 9.04 (m, 1H), 7.49 (dd,  $J = 8.4, 1.6$  Hz, 2H), 7.46 – 7.41 (m, 2H), 7.20 – 7.10 (m, 6H), 7.09 – 7.06 (m, 1H), 6.95 – 6.91 (m, 1H), 6.79 – 6.73 (m, 2H), 6.67 – 6.63 (m, 1H), 6.57 – 6.53 (m, 1H), 6.43 –

6.38 (m, 1H), 4.68 (d,  $J = 9.2$  Hz, 1H), 4.61-4.54 (m, 2H), 4.52-4.48 (m, 1H), 4.32 (dd,  $J = 15.6, 1.7$  Hz, 1H), 4.15 – 4.10 (m, 4H), 4.08-4.06 (m, 1H), 3.96 – 3.86 (m, 2H), 3.83-3.76 (m, 1H), 3.71 – 3.63 (m, 1H), 3.59-3.53 (m, 1H), 3.41-3.36 (m, 2H), 2.94 – 2.88 (m, 2H), 2.48 (d,  $J = 3.9$  Hz, 3H), 2.27-2.19 (m, 1H), 2.13-2.04 (m, 1H), 1.04 – 0.99 (m, 9H). HRMS (ESI)  $m/z$ : calcd for  $C_{50}H_{57}ClN_5O_8S^+$   $[M + H]^+$ , 922.3611; found, 922.3601.

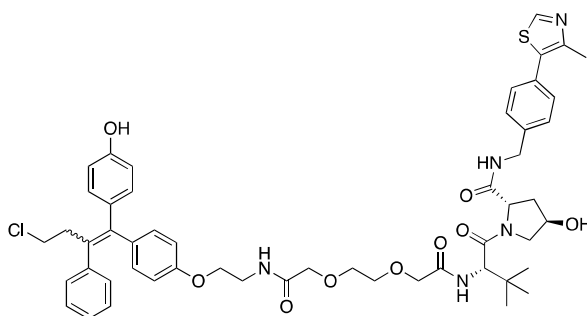

**(2S,4R)-1-((S)-2-(tert-butyl)-14-(4-(4-chloro-1-(4-hydroxyphenyl)-2-phenylbut-1-en-1-yl)phenoxy)-4,11-dioxo-6,9-dioxa-3,12-diazatetradecanoyl)-4-hydroxy-N-(4-(4-methylthiazol-5-yl)benzyl)pyrrolidine-2-carboxamide (PROTAC 12).** (white solid, 6.3 mg, 26% yield)  $^1H$  NMR (500 MHz, Methanol- $d_4$ )  $\delta$  9.29 (d,  $J = 10.0$  Hz, 1H), 7.50 – 7.42 (m, 4H), 7.20 – 7.14 (m, 3H), 7.14 – 7.07 (m, 4H), 6.93-6.91 (m, 1H), 6.80 – 6.74 (m, 2H), 6.68 – 6.63 (m, 1H), 6.57-6.54 (m, 1H), 6.42 – 6.36 (m, 1H), 4.70 (d,  $J = 9.5$  Hz, 1H), 4.62 – 4.53 (m, 1H), 4.52-4.46 (m, 2H), 4.41 – 4.33 (m, 1H), 4.10 – 3.99 (m, 5H), 3.94 – 3.85 (m, 2H), 3.81-3.76 (m, 1H), 3.74 – 3.64 (m, 5H), 3.58 – 3.47 (m, 1H), 3.39 (t,  $J = 7.4$  Hz, 2H), 2.94 – 2.89 (m, 2H), 2.52-2.50 (m, 3H), 2.26-2.21 (m, 1H), 2.10-2.04 (m, 1H), 1.02-0.99 (m, 9H). HRMS (ESI)  $m/z$ : calcd for  $C_{52}H_{61}ClN_5O_9S^+$   $[M + H]^+$ , 966.3873; found, 966.3879.

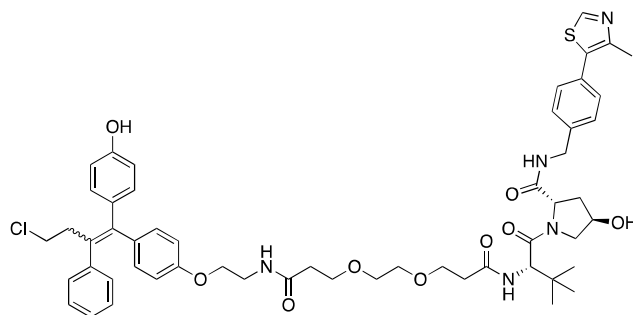

**(2S,4R)-1-((S)-2-(tert-butyl)-16-(4-(4-chloro-1-(4-hydroxyphenyl)-2-phenylbut-1-en-1-yl)phenoxy)-4,13-dioxo-7,10-dioxo-3,14-diazahexadecanoyl)-4-hydroxy-N-(4-(4-methylthiazol-5-yl)benzyl)pyrrolidine-2-carboxamide (PROTAC 13).** (white solid, 7.5 mg, 30% yield)  $^1\text{H}$  NMR (500 MHz, Methanol- $d_4$ )  $\delta$  9.31 (s, 1H), 7.57 – 7.42 (m, 4H), 7.20-7.15 (m, 3H), 7.15 – 7.07 (m, 4H), 6.97 – 6.91 (m, 1H), 6.81 – 6.74 (m, 2H), 6.69 – 6.64 (m, 1H), 6.56 (d,  $J$  = 8.8 Hz, 1H), 6.44 – 6.38 (m, 1H), 4.64 (d,  $J$  = 4.3 Hz, 1H), 4.60-4.49 (m, 3H), 4.42 – 4.32 (m, 1H), 4.07 (t,  $J$  = 5.4 Hz, 1H), 3.90-3.88 (m, 2H), 3.82 – 3.76 (m, 1H), 3.73 (t,  $J$  = 6.0 Hz, 1H), 3.70-3.63 (m, 3H), 3.61 – 3.51 (m, 5H), 3.49 (t,  $J$  = 5.2 Hz, 1H), 3.39 (t,  $J$  = 7.4 Hz, 2H), 2.91 (dt,  $J$  = 13.1, 7.4 Hz, 2H), 2.55 – 2.40 (m, 7H), 2.27 – 2.18 (m, 1H), 2.12 – 2.00 (m, 1H), 1.03-1.01 (m, 9H). HRMS (ESI)  $m/z$ : calcd for  $\text{C}_{54}\text{H}_{65}\text{ClN}_5\text{O}_9\text{S}^+$  [ $\text{M} + \text{H}$ ] $^+$ , 994.4186; found, 994.4196.

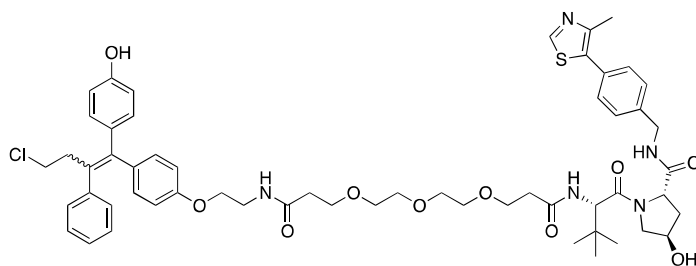

**(2S,4R)-1-((S)-2-(tert-butyl)-19-(4-(4-chloro-1-(4-hydroxyphenyl)-2-phenylbut-1-en-1-yl)phenoxy)-4,16-dioxo-7,10,13-trioxa-3,17-diazanonadecanoyl)-4-hydroxy-N-(4-(4-methylthiazol-5-yl)benzyl)pyrrolidine-2-carboxamide (PROTAC 14).** (white solid, 7.2 mg, 27% yield)  $^1\text{H}$  NMR (500 MHz, Methanol- $d_4$ )  $\delta$  9.17 (d,  $J$  = 1.8 Hz, 1H), 7.49 (d,  $J$  = 8.0 Hz, 2H), 7.46 – 7.41 (m, 2H), 7.22 – 7.15 (m, 3H), 7.15 – 7.07 (m, 4H), 6.97 – 6.92

(m, 1H), 6.81 – 6.74 (m, 2H), 6.69 – 6.64 (m, 1H), 6.58-6.56 (m, 1H), 6.44 – 6.38 (m, 1H), 4.64 (s, 1H), 4.58-4.49 (m, 3H), 4.39-4.34 (m, 1H), 4.08 (t,  $J = 5.4$  Hz, 1H), 3.91-3.88 (m, 2H), 3.79 (dd,  $J = 11.0, 3.8$  Hz, 1H), 3.75 – 3.66 (m, 4H), 3.60-3.53 (m, 9H), 3.48 (t,  $J = 5.4$  Hz, 1H), 3.40 (t,  $J = 7.4$  Hz, 2H), 2.92 (dt,  $J = 11.9, 7.4$  Hz, 2H), 2.60 – 2.39 (m, 7H), 2.24-2.20 (m, 1H), 2.10-2.05 (m, 1H), 1.03-1.01 (m, 9H). HRMS (ESI)  $m/z$ : calcd for  $C_{56}H_{69}ClN_5O_{10}S^+ [M + H]^+$ , 1038.4448; found, 1038.4442.

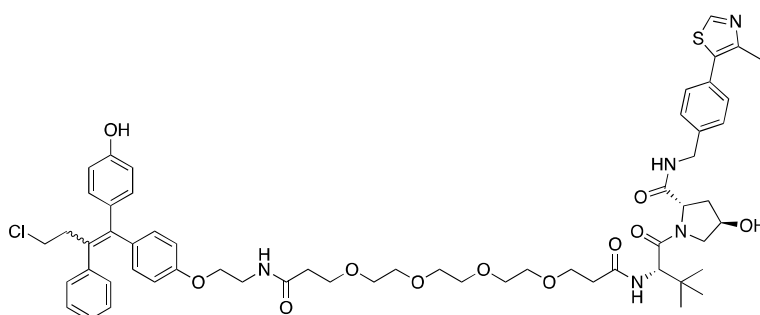

**N1-(2-(4-(4-chloro-1-(4-hydroxyphenyl)-2-phenylbut-1-en-1-yl)phenoxy)ethyl)-N16-((S)-1-((2S,4R)-4-hydroxy-2-((4-(4-methylthiazol-5-yl)benzyl)carbamoyl)pyrrolidin-1-yl)-3,3-dimethyl-1-oxobutan-2-yl)-4,7,10,13-tetraoxahexadecane-diamide**

**(PROTAC 15).** (white solid, 7.9 mg, 29% yield)  $^1H$  NMR (500 MHz, Methanol- $d_4$ )  $\delta$  9.23 (d,  $J = 1.3$  Hz, 1H), 7.50 (d,  $J = 8.2$  Hz, 2H), 7.44 (d,  $J = 8.1$  Hz, 2H), 7.21 – 7.15 (m, 3H), 7.15 – 7.07 (m, 4H), 6.95 (d,  $J = 8.7$  Hz, 1H), 6.81 – 6.75 (m, 2H), 6.69 – 6.64 (m, 1H), 6.57 (d,  $J = 8.8$  Hz, 1H), 6.44 – 6.38 (m, 1H), 4.64 (s, 1H), 4.60 – 4.47 (m, 3H), 4.39 – 4.34 (m, 1H), 4.09-4.06 (m, 1H), 3.91-3.88 (m, 2H), 3.79 (dd,  $J = 11.0, 3.8$  Hz, 1H), 3.74-3.67 (m Hz, 4H), 3.60-3.51 (m, 11H), 3.54 – 3.52 (m, 2H), 3.49 (t,  $J = 5.4$  Hz, 1H), 3.40 (t,  $J = 7.4$  Hz, 2H), 2.95 – 2.88 (m, 2H), 2.60 – 2.46 (m, 6H), 2.42 (t,  $J = 6.0$  Hz, 1H), 2.24-2.20 (m, 1H), 2.10-2.03 (m, 1H), 1.03-1.01 (m, 9H). HRMS (ESI)  $m/z$ : calcd for  $C_{58}H_{73}ClN_5O_{11}S^+ [M + H]^+$ , 1082.4710; found, 1082.4706.

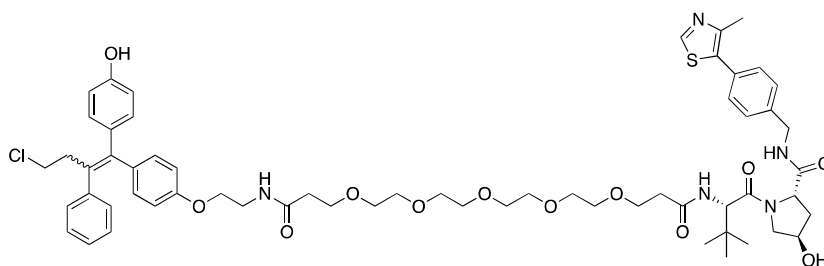

**N1-(2-(4-(4-chloro-1-(4-hydroxyphenyl)-2-phenylbut-1-en-1-yl)phenoxy)ethyl)-N19-((S)-1-((2S,4R)-4-hydroxy-2-((4-(4-methylthiazol-5-yl)benzyl)carbamoyl)pyrro-lidin-1-yl)-3,3-dimethyl-1-oxobutan-2-yl)-4,7,10,13,16-pentaoxonadecane-diamide (PROTAC 16).** (white solid, 8.1 mg, 28% yield)  $^1\text{H NMR}$  (500 MHz, Methanol- $d_4$ )  $\delta$  9.63 (d,  $J = 1.1$  Hz, 1H), 7.54 (d,  $J = 8.2$  Hz, 2H), 7.48 (d,  $J = 8.2$  Hz, 2H), 7.22 – 7.15 (m, 3H), 7.15 – 7.07 (m, 4H), 6.97 – 6.94 (m, 1H), 6.82 – 6.75 (m, 2H), 6.68 – 6.64 (m, 1H), 6.60 – 6.55 (m, 1H), 6.43 – 6.39 (m, 1H), 4.64 (s, 1H), 4.60 – 4.47 (m, 3H), 4.41 – 4.34 (m, 1H), 4.08 (t,  $J = 5.4$  Hz, 1H), 3.92-3.88 (m, 2H), 3.83 – 3.77 (m, 1H), 3.75 – 3.68 (m, 4H), 3.62 – 3.56 (m, 13H), 3.55-3.54 (m, 4H), 3.49 (t,  $J = 5.4$  Hz, 1H), 3.41-3.38 (m, 2H), 2.95 – 2.90 (m, 2H), 2.61 – 2.53 (m, 4H), 2.49-2.42 (m, 3H), 2.25-2.20 (m, 1H), 2.10-2.05 (m, 1H), 1.03-1.01 (m, 9H). HRMS (ESI)  $m/z$ : calcd for  $\text{C}_{60}\text{H}_{77}\text{ClN}_5\text{O}_{12}\text{S}^+$  [ $\text{M} + \text{H}$ ] $^+$ , 1126.4972; found, 1126.4981.



#### 4. Procedure for the synthesis and characterization data of negative control PROTAC 8N.

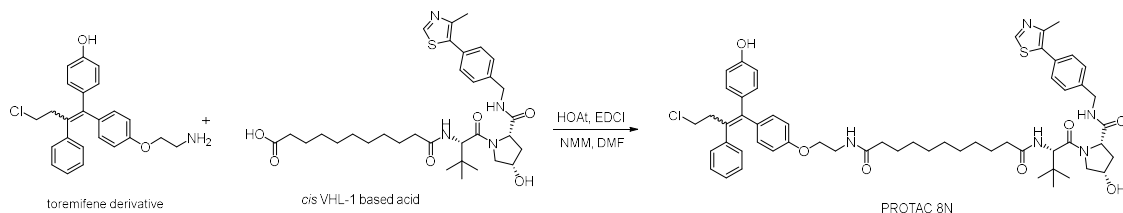

A mixture of toremifene derivative (1.0 eq.), *cis* VHL-1 based acid (1.0 eq.), HOAt (2.0 eq.), EDCI (2.0 eq.), NMM (5.0 eq.) and DMF was stirred at room temperature overnight. LC-MS showed the reaction was complete. The reaction mixture was filtered and purified by prep-HPLC (eluent: with 10%-100% (v1: v2) acetonitrile in water (containing 0.05% HCl)). The collections were concentrated in vacuo to remove most of the solvent and then lyophilized to afford N1-(2-(4-(4-chloro-1-(4-hydroxyphenyl)-2-phenylbut-1-en-1-yl)phenoxy)ethyl)-N11-((S)-1-((2S,4S)-4-hydroxy-2-((4-(4-methylthiazol-5-yl)benzyl)carbamoyl)pyrrolidin-1-yl)-3,3-dimethyl-1-oxobutan-2-yl)undecanediamide (PROTAC 8N). (white solid, 10.6 mg, 38% yield). <sup>1</sup>H NMR (500 MHz, DMSO-*d*<sub>6</sub>) δ 9.63 – 9.08 (m, 1H), 8.98 (s, 1H), 8.70 – 8.56 (m, 1H), 8.10 – 7.90 (m, 1H), 7.84 (d, *J* = 8.8 Hz, 1H), 7.39 (q, *J* = 8.4 Hz, 4H), 7.22 – 7.10 (m, 6H), 7.05 (d, *J* = 8.5 Hz, 1H), 6.93 (t, *J* = 9.8 Hz, 1H), 6.80 – 6.67 (m, 2H), 6.64 – 6.55 (m, 2H), 6.45 – 6.34 (m, 1H), 4.52 – 4.39 (m, 2H), 4.36 (dd, *J* = 8.4, 6.2 Hz, 1H), 4.27-4.18 (m, 2H), 4.03 – 3.90 (m, 2H), 3.81 (t, *J* = 5.5 Hz, 1H), 3.31 (d, *J* = 5.5 Hz, 4H), 2.87 (dt, *J* = 10.3, 7.4 Hz, 2H), 2.44 (s, 3H), 2.35-2.29 (m, 1H), 2.23 (dt, *J* = 14.4, 7.4 Hz, 1H), 2.13 – 2.00 (m, 3H), 1.74 (dt, *J* = 12.3, 6.0 Hz, 1H), 1.45 (dd, *J* = 13.3, 6.6 Hz, 4H), 1.20 (d, *J* = 8.2 Hz, 11H), 0.92 (d, *J* = 21.5 Hz, 9H). HRMS (ESI) *m/z*: calcd for C<sub>57</sub>H<sub>71</sub>ClN<sub>5</sub>O<sub>7</sub>S<sup>+</sup> [M + H]<sup>+</sup>, 1004.4757; found, 1004.4763.

**Supplementary Table 1.** The prediction results of DeepPROTACs model on test set.

| test set     | truth=1 | truth=0 | total |
|--------------|---------|---------|-------|
| prediction=1 | 315     | 74      | 389   |
| prediction=0 | 54      | 124     | 178   |
| total        | 369     | 198     | 567   |

  

| test set     | truth=1 | truth=0 | total  |
|--------------|---------|---------|--------|
| prediction=1 | 55.56%  | 13.05%  | 68.61% |
| prediction=0 | 9.52%   | 21.87%  | 31.39% |
| total        | 65.08%  | 34.92%  | 100%   |

**Supplementary Table 2.** The distribution of active and inactive PROTAC molecules across various target proteins and E3 ligases.

| Target_E3          | Active | Inactive | Target_E3          | Active | Inactive |
|--------------------|--------|----------|--------------------|--------|----------|
| ABL_CRBN           | 3      | 2        | ALK_CRBN           | 10     | 43       |
| ABL_IAP            | 1      | 1        | ALK_VHL            | 12     | 10       |
| ABL_VHL            | 1      | 2        | AR_CRBN            | 16     | 42       |
| ABL_cIAP1          | 2      | 10       | AR_MDM2            | 0      | 1        |
| AKT1_CRBN          | 7      | 10       | AR_VHL             | 46     | 39       |
| AKT1_VHL           | 3      | 8        | AR_cIAP1           | 0      | 18       |
| AKT2_CRBN          | 1      | 12       | AURKA_CRBN         | 4      | 3        |
| AKT2_VHL           | 2      | 16       | AURKA_VHL          | 0      | 2        |
| ALK-G1202R_CRBN    | 0      | 2        | Alpha-tubulin_CRBN | 0      | 13       |
| ALK-G1202R_VHL     | 0      | 1        | BCL-xL_CRBN        | 24     | 11       |
| BCL-xL_VHL         | 9      | 18       | BCR-ABL_VHL        | 7      | 28       |
| BCL-xL_XIAP        | 6      | 2        | BCR-ABL_cIAP1      | 4      | 16       |
| BCL-xL_cIAP1       | 0      | 8        | BRAF-D594N_VHL     | 3      | 0        |
| BCL2_CRBN          | 0      | 11       | BRAF-G466E_VHL     | 4      | 0        |
| BCL6_CRBN          | 1      | 0        | BRAF-G466V_VHL     | 2      | 0        |
| BCR-ABL-E255K_CRBN | 0      | 1        | BRAF-G469A_VHL     | 2      | 1        |
| BCR-ABL-H396R_CRBN | 0      | 1        | BRAF-K601E_VHL     | 1      | 3        |
| BCR-ABL-T315I_CRBN | 0      | 3        | BRAF-V600E_CRBN    | 7      | 29       |
| BCR-ABL-V468F_CRBN | 0      | 1        | BRAF-V600E_VHL     | 3      | 11       |
| BCR-ABL_CRBN       | 13     | 24       | BRAF-V600K_VHL     | 0      | 2        |
| BRAF_CRBN          | 0      | 4        | BRD4_MDM2          | 2      | 0        |
| BRAF_VHL           | 0      | 4        | BRD4_VHL           | 25     | 20       |
| BRD2_CRBN          | 33     | 6        | BRD4_cIAP1         | 1      | 1        |
| BRD2_VHL           | 5      | 9        | BRD7_DCAF15        | 0      | 2        |
| BRD3-BD2_KEAP1     | 0      | 3        | BRD7_VHL           | 3      | 28       |
| BRD3_CRBN          | 31     | 8        | BRD9_CRBN          | 9      | 5        |
| BRD3_VHL           | 5      | 7        | BRD9_DCAF15        | 0      | 2        |
| BRD4-BD1_KEAP1     | 0      | 3        | BRD9_VHL           | 8      | 26       |
| BRD4-BD2_KEAP1     | 0      | 3        | BRDT_VHL           | 1      | 0        |
| BRD4_CRBN          | 51     | 22       | BTK-C481S_CRBN     | 4      | 0        |
| BTK_CRBN           | 39     | 55       | CDK2_CRBN          | 14     | 23       |
| BTK_MDM2           | 0      | 4        | CDK4_CRBN          | 17     | 39       |
| BTK_VHL            | 2      | 10       | CDK4_MDM2          | 1      | 4        |

|                   |    |    |                             |    |    |
|-------------------|----|----|-----------------------------|----|----|
| BTK_XIAP          | 0  | 1  | CDK4_VHL                    | 3  | 9  |
| BTK_cIAP1         | 0  | 5  | CDK4_cIAP1                  | 2  | 5  |
| Beta-tubulin_CRBN | 0  | 13 | CDK5_CRBN                   | 1  | 1  |
| CBP_CRBN          | 1  | 0  | CDK6_CRBN                   | 44 | 16 |
| CDK12-C1039F_CRBN | 2  | 0  | CDK6_MDM2                   | 1  | 4  |
| CDK12_CRBN        | 3  | 5  | CDK6_VHL                    | 7  | 5  |
| CDK1_CRBN         | 0  | 2  | CDK6_XIAP                   | 0  | 1  |
| CDK6_cIAP1        | 2  | 5  | Cdc20_CRBN                  | 0  | 8  |
| CDK7_CRBN         | 0  | 1  | Cdc20_VHL                   | 0  | 7  |
| CDK8_CRBN         | 0  | 3  | EED_VHL                     | 2  | 6  |
| CDK9_CRBN         | 17 | 88 | EGFR-L858R-T790M-C797S_CRBN | 0  | 1  |
| CRABP-II_cIAP1    | 1  | 4  | EGFR-L858R-T790M-L718Q_CRBN | 0  | 1  |
| CRABP-I_cIAP1     | 2  | 1  | EGFR-L858R-T790M_CRBN       | 6  | 24 |
| CRABP2_cIAP1      | 0  | 2  | EGFR-L858R-T790M_MDM2       | 1  | 4  |
| CRBN_CRBN         | 2  | 5  | EGFR-L858R-T790M_VHL        | 3  | 14 |
| CRBN_VHL          | 8  | 19 | EGFR-L858R-T790M_cIAP1      | 0  | 1  |
| CYP1B1_CRBN       | 1  | 3  | EGFR-L858R_CRBN             | 1  | 0  |
| EGFR-L858R_VHL    | 2  | 0  | ERRalpha_CRBN               | 0  | 1  |
| EGFR-e19d_CRBN    | 13 | 2  | ERRalpha_VHL                | 7  | 4  |
| EGFR-e19d_VHL     | 3  | 8  | ER_CRBN                     | 12 | 15 |
| EGFR_CRBN         | 2  | 17 | ER_IAP                      | 0  | 2  |
| EGFR_MDM2         | 0  | 5  | ER_VHL                      | 49 | 95 |
| EGFR_VHL          | 4  | 13 | ER_XIAP                     | 4  | 2  |
| EGFR_cIAP1        | 0  | 1  | ER_cIAP1                    | 6  | 18 |
| EP300_CRBN        | 1  | 0  | EZH2_CRBN                   | 4  | 14 |
| ERK1_CRBN         | 0  | 1  | FAK_CRBN                    | 32 | 0  |
| ERK2_CRBN         | 0  | 1  | FAK_VHL                     | 12 | 1  |
| FKBP12-F36V_CRBN  | 2  | 0  | HDAC1_VHL                   | 0  | 2  |
| FKBP12-F36V_VHL   | 1  | 1  | HDAC1_cIAP1                 | 0  | 1  |
| FKBP12_CRBN       | 4  | 6  | HDAC2_CRBN                  | 0  | 8  |
| FLT-3_CRBN        | 2  | 7  | HDAC2_VHL                   | 0  | 2  |
| FLT-3_VHL         | 1  | 0  | HDAC3_CRBN                  | 0  | 12 |
| GCN5_CRBN         | 1  | 0  | HDAC3_VHL                   | 3  | 3  |
| GSK-3beta_CRBN    | 1  | 15 | HDAC6_CRBN                  | 25 | 15 |
| GSPT1_CRBN        | 7  | 3  | HDAC6_VHL                   | 5  | 7  |
| H-PGDS_CRBN       | 7  | 0  | HDAC6_cIAP1                 | 0  | 1  |
| HDAC1_CRBN        | 0  | 4  | HDAC8_cIAP1                 | 0  | 1  |
| HMGCR_CRBN        | 1  | 39 | IRAK4_XIAP                  | 0  | 2  |
| HPGDS_CRBN        | 1  | 0  | JAK1_CRBN                   | 0  | 8  |

|                |    |    |                |    |    |
|----------------|----|----|----------------|----|----|
| HPGDS_cIAP1    | 0  | 1  | JAK1_VHL       | 0  | 8  |
| HPK1_CRBN      | 2  | 2  | JAK1_XIAP      | 0  | 8  |
| IDO1_CRBN      | 0  | 7  | JAK2_CRBN      | 0  | 8  |
| IGF-1R_CRBN    | 0  | 11 | JAK2_VHL       | 0  | 8  |
| IRAK3_CRBN     | 4  | 6  | JAK2_XIAP      | 0  | 8  |
| IRAK3_VHL      | 0  | 8  | KRAS-G12C_CRBN | 0  | 16 |
| IRAK4_CRBN     | 15 | 19 | KRAS-G12C_VHL  | 0  | 6  |
| IRAK4_VHL      | 0  | 4  | KRAS_CRBN      | 0  | 2  |
| KRAS_VHL       | 0  | 4  | NSD3_CRBN      | 0  | 2  |
| MCL1_CRBN      | 0  | 17 | NSD3_VHL       | 0  | 4  |
| MDM2_CRBN      | 32 | 18 | PARP1_CRBN     | 14 | 38 |
| MDM2_VHL       | 0  | 3  | PARP1_MDM2     | 0  | 2  |
| MEK1_CRBN      | 2  | 40 | PARP1_VHL      | 2  | 5  |
| MEK1_VHL       | 12 | 22 | PARP2_CRBN     | 1  | 3  |
| MEK2_CRBN      | 4  | 19 | PBRM1_VHL      | 1  | 2  |
| MEK2_VHL       | 12 | 15 | PCAF_CRBN      | 1  | 1  |
| MerTK_CRBN     | 1  | 0  | PD-L1_CRBN     | 0  | 28 |
| NS3_CRBN       | 1  | 2  | PDEdelta_CRBN  | 1  | 11 |
| PDEdelta_VHL   | 1  | 0  | SHP2_CRBN      | 6  | 10 |
| PDL1_CRBN      | 0  | 19 | SHP2_VHL       | 15 | 8  |
| PI3Kalpha_CRBN | 1  | 3  | SIRT2_CRBN     | 0  | 3  |
| PLK1_CRBN      | 2  | 0  | SMARCA2_VHL    | 6  | 1  |
| PRMT5_VHL      | 0  | 6  | SMARCA4_VHL    | 6  | 1  |
| RAR_cIAP1      | 1  | 0  | STAT3_CRBN     | 4  | 19 |
| RIPK2_CRBN     | 2  | 0  | Src_CRBN       | 0  | 11 |
| RIPK2_VHL      | 2  | 0  | TBK1_CRBN      | 0  | 2  |
| RIPK2_cIAP1    | 2  | 1  | TRIM24_VHL     | 0  | 2  |
| RPS6KA1_CRBN   | 1  | 1  | TRKA_CRBN      | 19 | 0  |
| TRKB_CRBN      | 9  | 1  | c-Met_VHL      | 1  | 0  |
| TRKC_CRBN      | 8  | 3  | eIF4E_CRBN     | 6  | 15 |
| TRKC_MDM2      | 0  | 2  | eIF4E_VHL      | 2  | 1  |
| VEGFR-2_VHL    | 0  | 5  | p38alpha_CRBN  | 7  | 16 |
| VHL_VHL        | 2  | 5  | p38alpha_VHL   | 3  | 5  |
| WDR5_CRBN      | 0  | 5  | p38beta_CRBN   | 2  | 0  |
| WDR5_VHL       | 0  | 15 | p38delta_CRBN  | 1  | 0  |
| Wee1_CRBN      | 4  | 0  | p38delta_VHL   | 3  | 5  |
| c-KIT_CRBN     | 0  | 15 |                |    |    |
| c-Met_CRBN     | 0  | 12 |                |    |    |

**Supplementary Table 3.** Densitometry quantifications of Western blotting data in order (normalized by GAPDH using the Image J software and DMSO was used as negative control) for easy comparison between two cell lines.

| Compound ID | concentration (nM, in MCF-7 cell) |      |      |      | concentration (nM, in T-47D cell) |      |      |      |
|-------------|-----------------------------------|------|------|------|-----------------------------------|------|------|------|
|             | 1                                 | 10   | 50   | 100  | 1                                 | 10   | 50   | 100  |
| PROTAC 1    | 2.58                              | 1.89 | 0.90 | 0.81 | 1.02                              | 0.76 | 0.28 | 0.30 |
| PROTAC 2    | 2.17                              | 2.72 | 1.51 | 1.59 | 1.26                              | 0.99 | 0.70 | 0.58 |
| PROTAC 3    | 2.08                              | 1.89 | 1.36 | 1.19 | 1.06                              | 0.83 | 0.43 | 0.32 |
| PROTAC 4    | 0.83                              | 0.62 | 0.31 | 0.26 | 1.43                              | 0.38 | 0.12 | 0.08 |
| PROTAC 5    | 1.19                              | 0.70 | 0.29 | 0.21 | 1.00                              | 0.31 | 0.04 | 0.02 |
| PROTAC 6    | 1.15                              | 0.52 | 0.26 | 0.16 | 1.42                              | 0.28 | 0.05 | 0.06 |
| PROTAC 7    | 1.15                              | 0.63 | 0.20 | 0.11 | 1.12                              | 0.43 | 0.05 | 0.04 |
| PROTAC 8    | 1.08                              | 0.36 | 0.12 | 0.08 | 0.68                              | 0.25 | 0.06 | 0.04 |
| PROTAC 9    | 1.10                              | 0.84 | 0.38 | 0.22 | 1.28                              | 0.67 | 0.31 | 0.22 |
| PROTAC 10   | 1.12                              | 1.21 | 1.02 | 0.60 | 1.25                              | 1.08 | 1.05 | 0.71 |
| PROTAC 11   | 1.24                              | 1.15 | 0.82 | 0.94 | 1.34                              | 1.08 | 0.78 | 0.64 |
| PROTAC 12   | 0.88                              | 0.81 | 0.22 | 0.27 | 1.41                              | 0.79 | 0.25 | 0.07 |
| PROTAC 13   | 1.12                              | 1.06 | 1.30 | 0.24 | 1.07                              | 0.77 | 0.14 | 0.05 |
| PROTAC 14   | 1.06                              | 1.03 | 0.59 | 0.33 | 1.71                              | 1.77 | 0.46 | 0.18 |
| PROTAC 15   | 0.92                              | 0.92 | 0.47 | 0.30 | 1.33                              | 0.75 | 0.07 | 0.04 |
| PROTAC 16   | 0.88                              | 0.93 | 0.67 | 0.97 | 1.16                              | 1.15 | 1.15 | 1.22 |

**Supplementary Table 4.** The prediction results of DeepPROTACs model on our experimental dataset.

| PROTAC ID        | Expt.    | Prediction |
|------------------|----------|------------|
| <b>PROTAC 1</b>  | <b>1</b> | <b>1</b>   |
| PROTAC 2         | 0        | 1          |
| PROTAC 3         | 0        | 1          |
| <b>PROTAC 4</b>  | <b>1</b> | <b>1</b>   |
| <b>PROTAC 5</b>  | <b>1</b> | <b>1</b>   |
| <b>PROTAC 6</b>  | <b>1</b> | <b>1</b>   |
| <b>PROTAC 7</b>  | <b>1</b> | <b>1</b>   |
| <b>PROTAC 8</b>  | <b>1</b> | <b>1</b>   |
| <b>PROTAC 9</b>  | <b>1</b> | <b>1</b>   |
| PROTAC 10        | 0        | 1          |
| PROTAC 11        | 0        | 1          |
| <b>PROTAC 12</b> | <b>1</b> | <b>1</b>   |
| <b>PROTAC 13</b> | <b>1</b> | <b>1</b>   |
| <b>PROTAC 14</b> | <b>1</b> | <b>1</b>   |
| PROTAC 15        | 1        | 0          |
| <b>PROTAC 16</b> | <b>0</b> | <b>0</b>   |

Note: bold means correct prediction.

**Supplementary Table 5.** The evaluation results of DeepPROTACs model on different targets.

| Targets              | EZH2   | STAT3  | eIF4E  | FLT-3  |
|----------------------|--------|--------|--------|--------|
| Accuracy on Test set | 76.67% | 77.99% | 79.77% | 77.22% |
| Accuracy on Targets  | 77.78% | 75.36% | 65.28% | 80.00% |



**Supplementary Table 6.** The encoding table for SMILES.

| character | frequency | code | character | frequency | code |
|-----------|-----------|------|-----------|-----------|------|
| 'C'       | 16867032  | 1    | '\'       | 40666     | 21   |
| '('       | 7201666   | 2    | '3'       | 1203951   | 22   |
| '='       | 3164974   | 3    | '4'       | 149622    | 23   |
| 'O'       | 4806890   | 4    | 'I'       | 208445    | 24   |
| ')'       | 7201666   | 5    | 'F'       | 463503    | 25   |
| 'N'       | 3274399   | 6    | 'o'       | 263404    | 26   |
| '['       | 2272539   | 7    | 'I'       | 9154      | 27   |
| '@'       | 2787747   | 8    | 'B'       | 67994     | 28   |
| 'H'       | 1906099   | 9    | 'r'       | 62314     | 29   |
| ']'       | 2272539   | 10   | 'P'       | 2852      | 30   |
| 'I'       | 5943024   | 11   | '5'       | 7974      | 31   |
| 'c'       | 15747890  | 12   | '6'       | 1724      | 32   |
| 'n'       | 2818752   | 13   | 'i'       | 583       | 33   |
| '/'       | 183604    | 14   | '7'       | 616       | 34   |
| '2'       | 3746324   | 15   | '8'       | 310       | 35   |
| '#'       | 85212     | 16   | '9'       | 86        | 36   |
| 'S'       | 437668    | 17   | '%'       | 42        | 37   |
| 's'       | 242192    | 18   | '0'       | 24        | 38   |
| '+'       | 100208    | 19   | 'p'       | 2         | 39   |
| '-'       | 340633    | 20   |           |           |      |

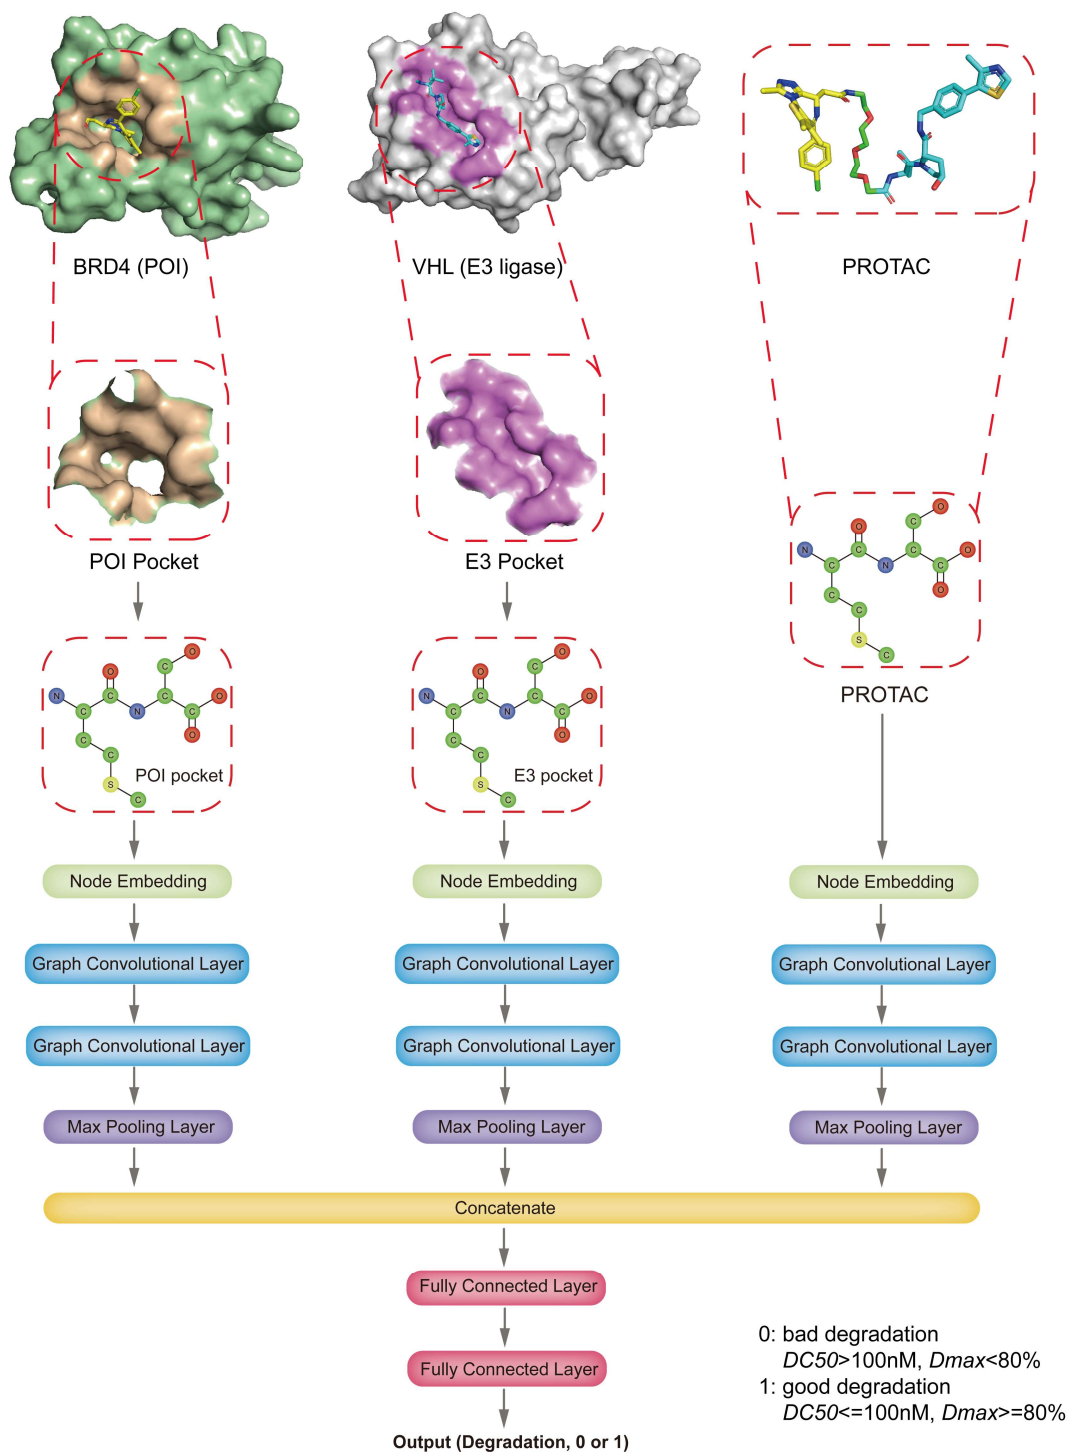

**Supplementary Fig.1.** The network architecture of an alternative model. The preprocess of POI, E3 ligase and PROTAC molecule: extraction of binding pocket from POI (BRD4) and E3 ligase (VHL) and conversion to graph representations, conversion of PROTAC molecule to graph representation.

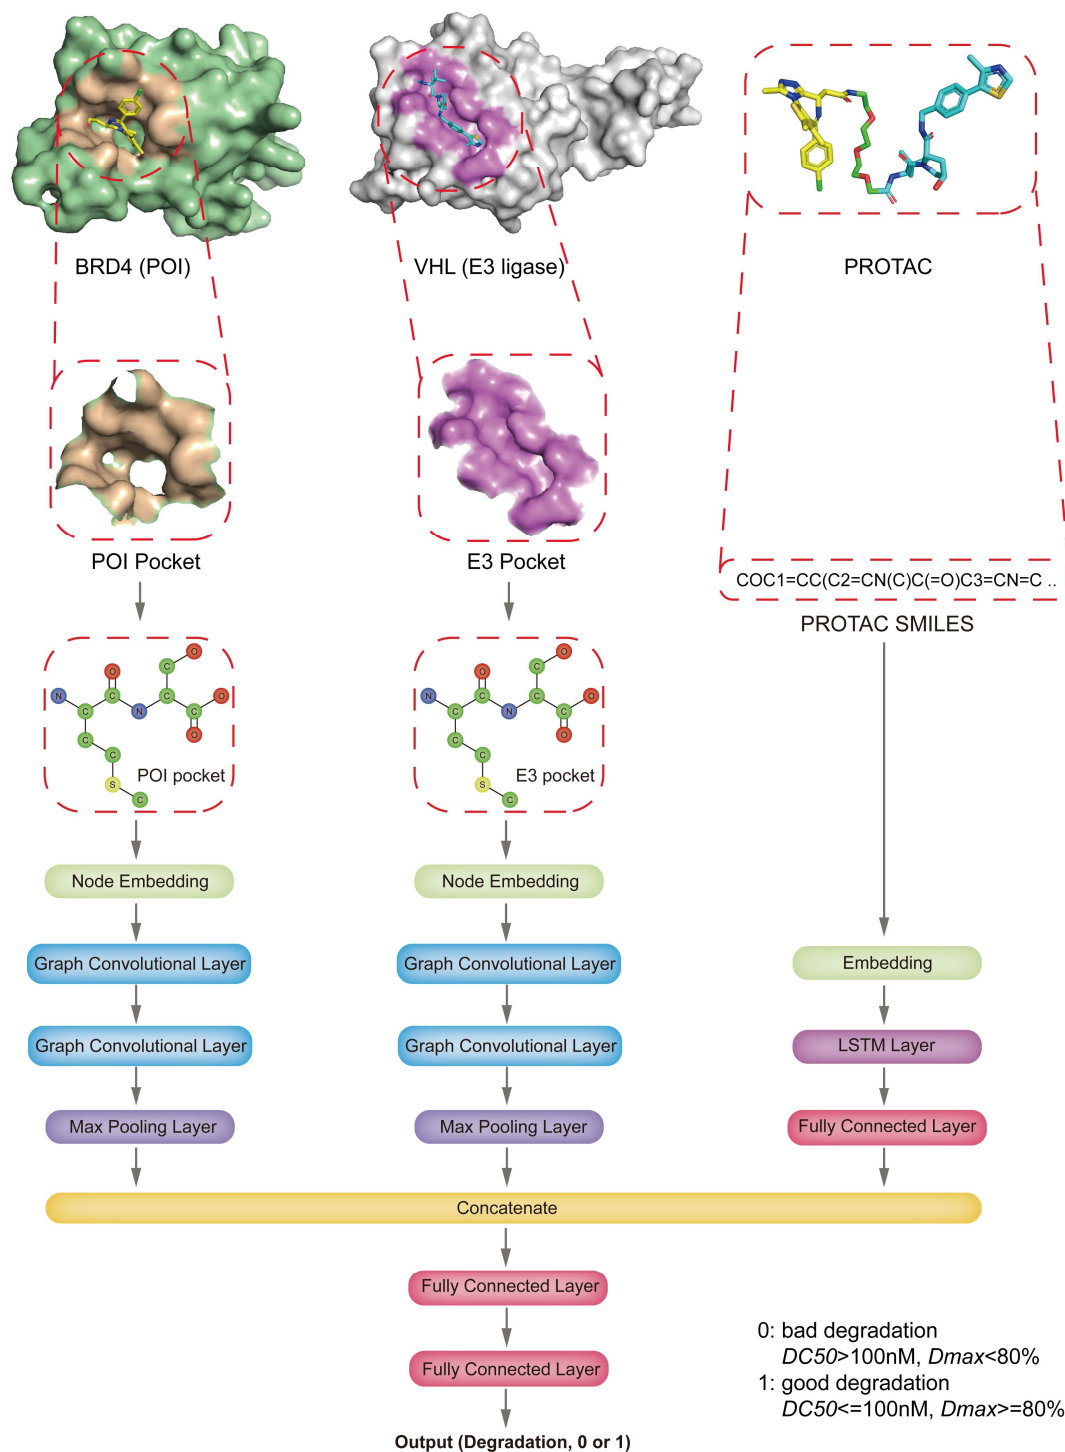

**Supplementary Fig.2.** The network architecture of an alternative model. The preprocess of POI, E3 ligase and PROTAC molecule: extraction of binding pocket from POI (BRD4) and E3 ligase (VHL) and conversion to graph representations, conversion of PROTAC molecule to SMILES.

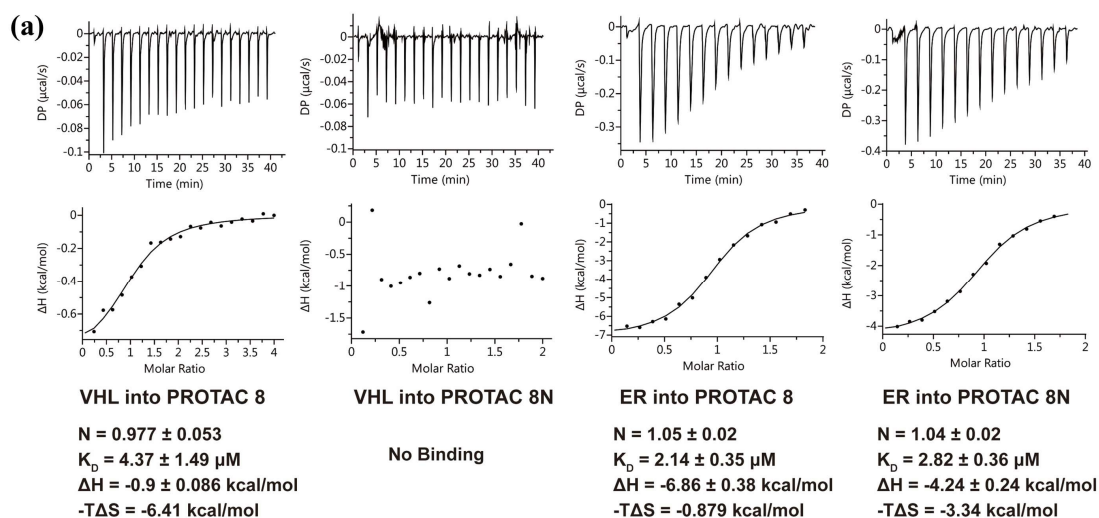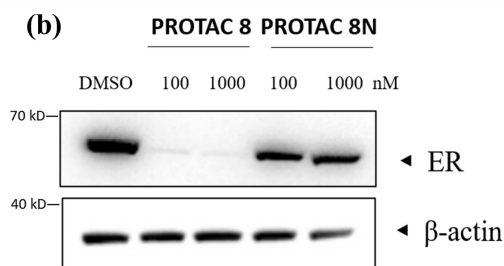

**Supplementary Fig.3.** Validation of ER PROTACs. (a) Thermodynamic data, representative titration raw data, and fitting curves of VHL and ER titrated into PROTAC 8 and PROTAC 8N. Binding kinetic and thermodynamic data are shown below as mean values  $\pm$  SD. Source Data are provided as a Source Data file. (b) Western blotting analysis of ER in T-47D cell line by PROTAC 8 and negative compound PROTAC 8N. All western blot data are representative of at least two independent replicates.

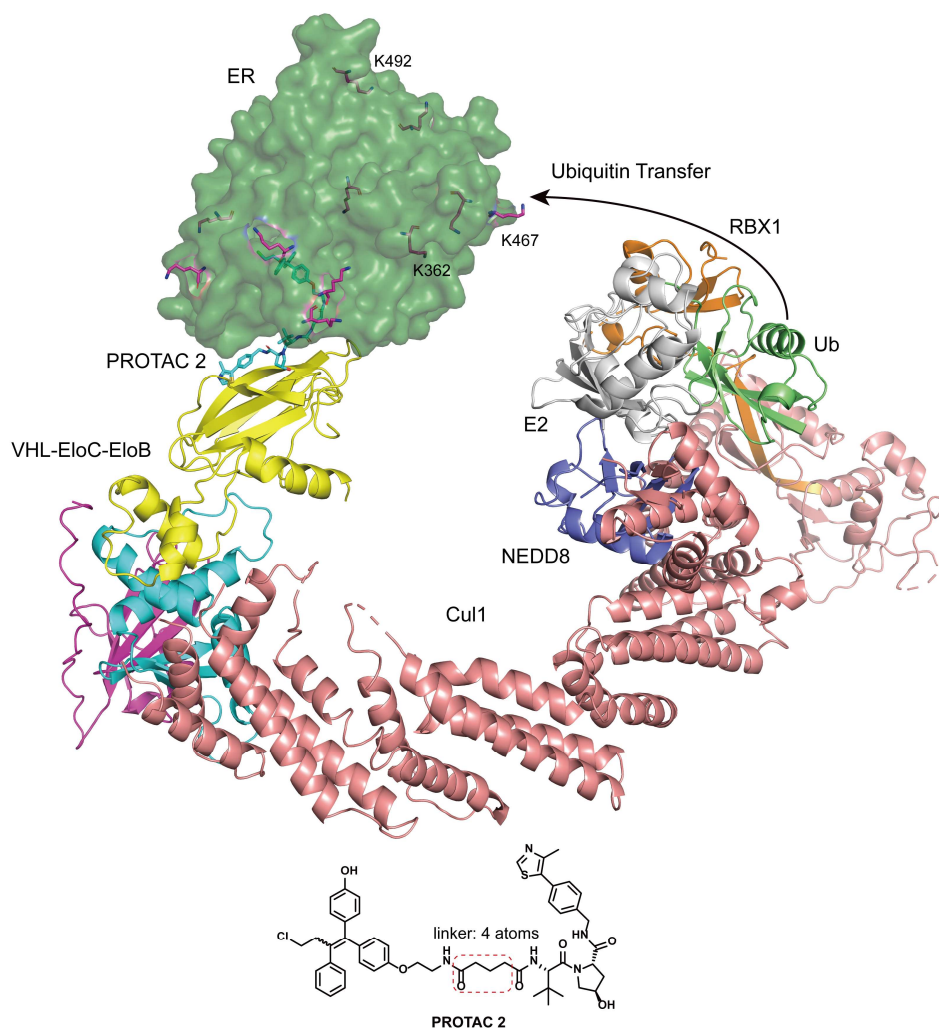

**Supplementary Fig.4.** Computational model of whole CRLs (Cullin-Ring E3 ubiquitin Ligases) induced by PROTAC 2. The ternary complex (ER, VHL-EloC-EloB and PROTAC 2) is aligned with crystal structure of NEDD8-CUL1-RBX1-UB-E2 (PDB ID: 6TTU) with the help of Cul2-Rbx1-EloBC-VHL structure (PDB ID: 5N4W). The structure of 5N4W was hidden for the sake of clarity.

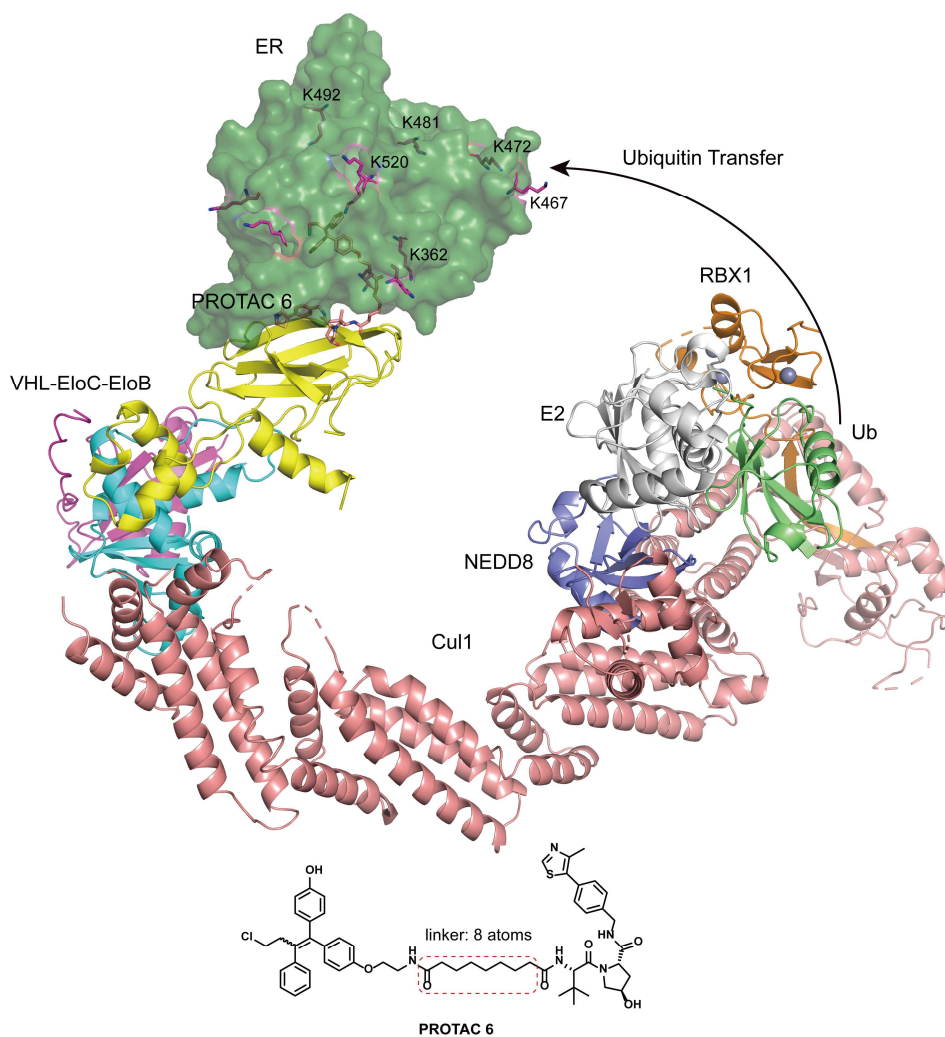

**Supplementary Fig.5.** Computational model of whole CRLs (Cullin-Ring E3 ubiquitin Ligases) induced by PROTAC 6. The ternary complex (ER, VHL-EloC-EloB and PROTAC 6) is aligned with crystal structure of NEDD8-CUL1-RBX1-UB-E2 (PDB ID: 6TTU) with the help of Cul2-Rbx1-EloBC-VHL structure (PDB ID: 5N4W). The structure of 5N4W was hidden for the sake of clarity.

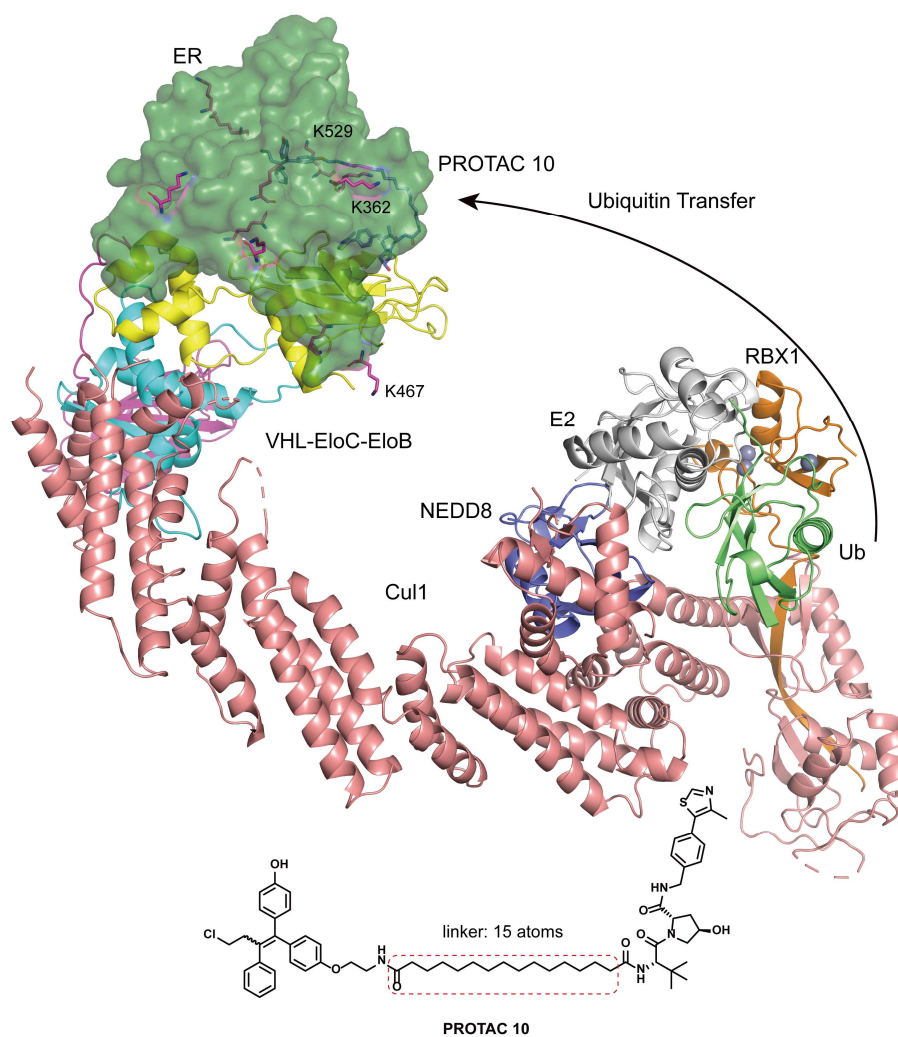

**Supplementary Fig.6.** Computational model of whole CRLs (Cullin-Ring E3 ubiquitin Ligases) induced by PROTAC 10. The ternary complex (ER, VHL-EloC-EloB and PROTAC 10) is aligned with crystal structure of NEDD8-CUL1-RBX1-UB-E2 (PDB ID: 6TTU) with the help of Cul2-Rbx1-EloBC-VHL structure (PDB ID: 5N4W). The structure of 5N4W was hidden for the sake of clarity.



**Supplementary Fig.7.** Unprocessed blots related to Figure 6. Protein marker (Thermo Scientific™, #26616) was used. Membranes were cropped according to the molecule weight of ER and GAPDH before exposure.

**MCF-7 cell line**

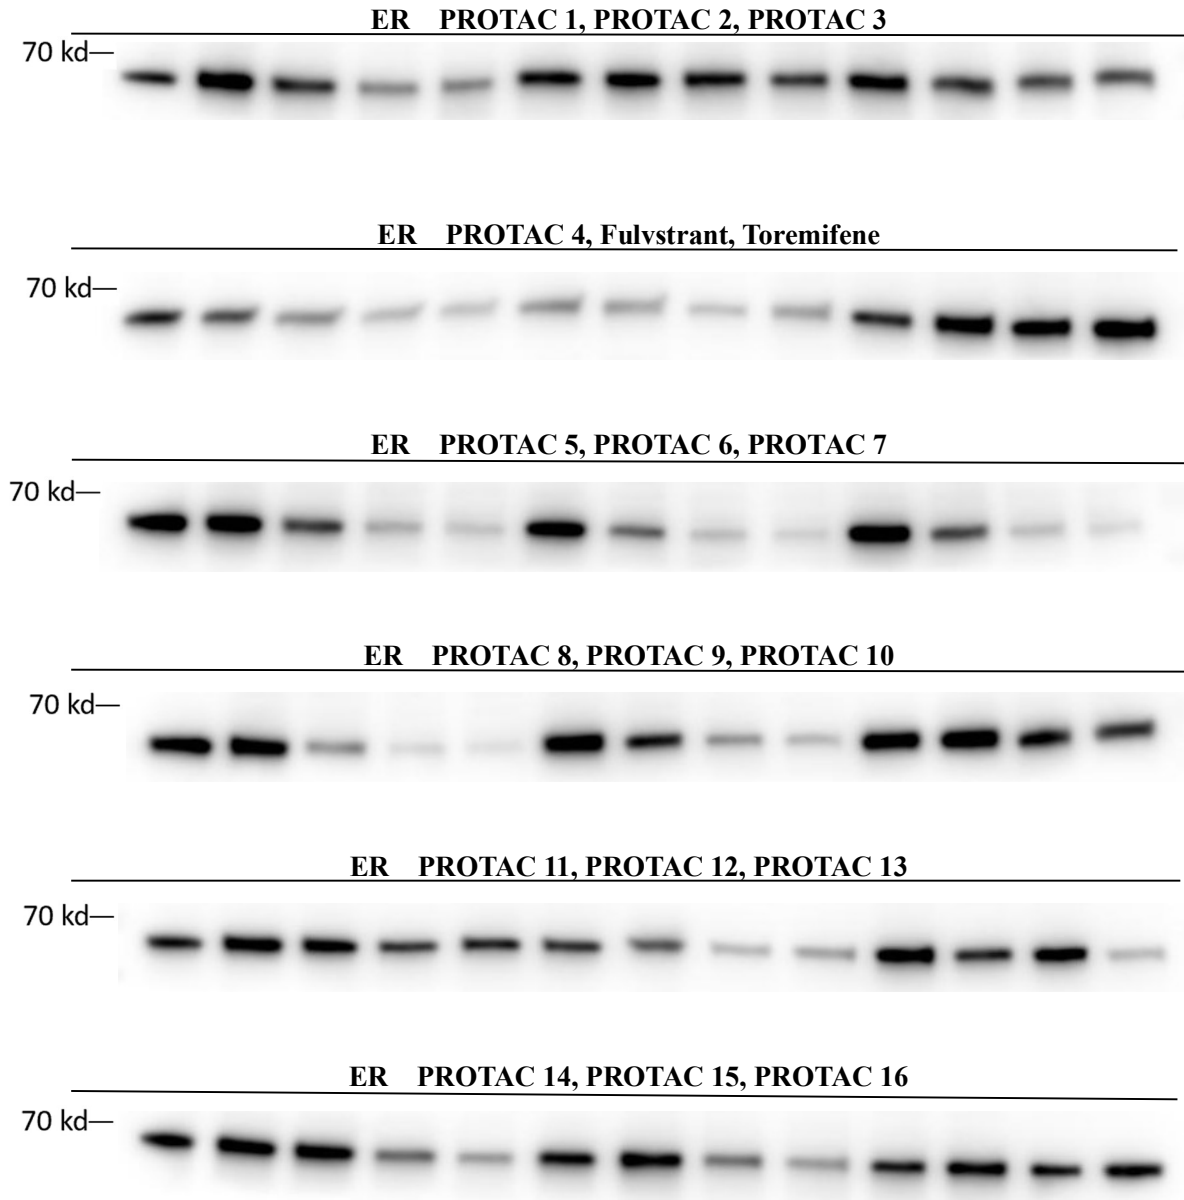



**MCF-7 cell line**

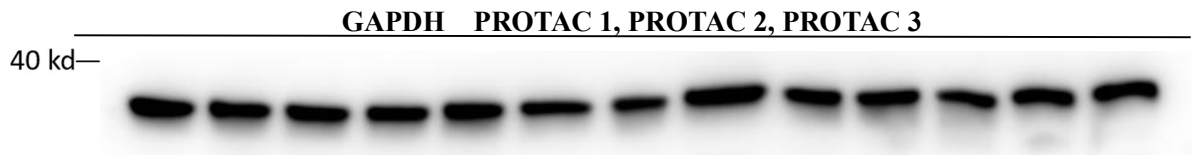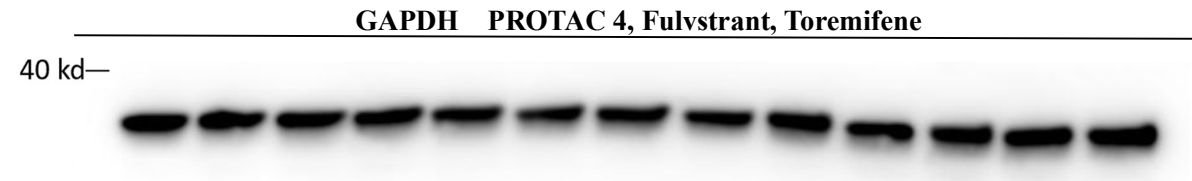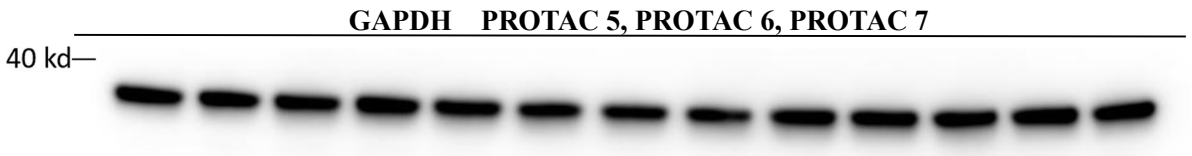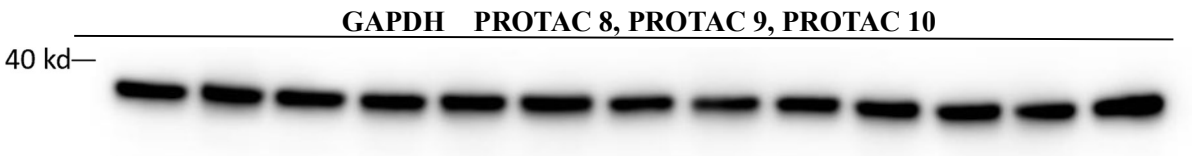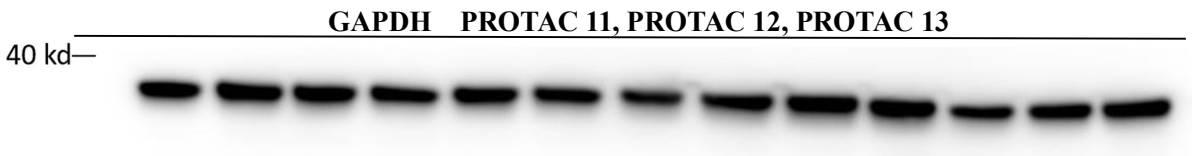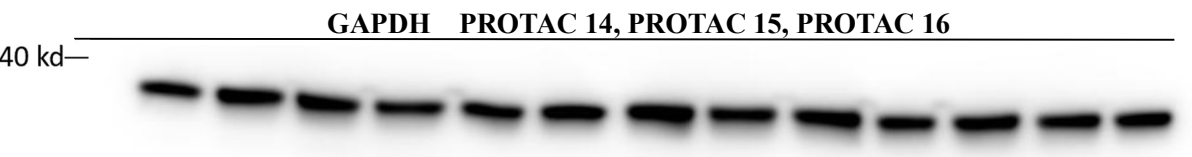

T-47D cell line

ER PROTAC 16, PROTAC 1, PROTAC 2

---

70 kd—

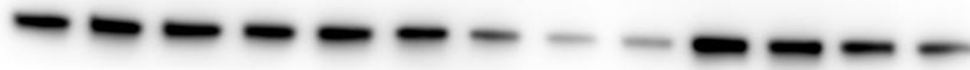

ER PROTAC 5, PROTAC 4, PROTAC 3

---

70 kd—

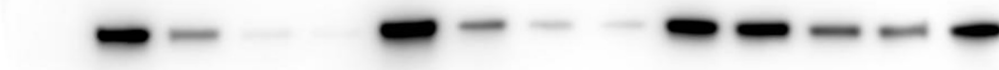

ER PROTAC 8, PROTAC 7, PROTAC 6

---

70 kd—

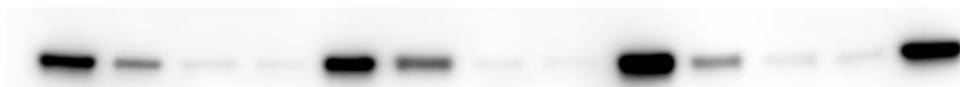

ER PROTAC 9, PROTAC 10, PROTAC 11

---

70 kd—

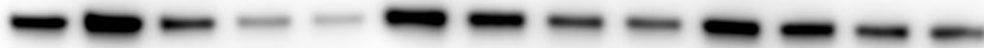

ER PROTAC 13, PROTAC 14, PROTAC 15

---

70 kd—

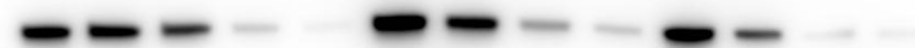

**ER PROTAC 12, Fulvstrant**

---

70 kd—

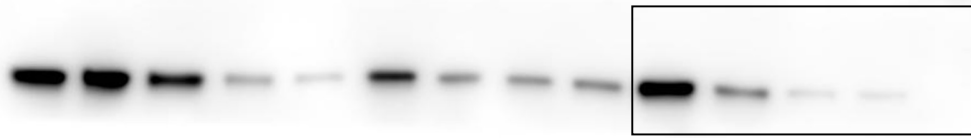

**Not related in this article**

**T-47D cell line**

**GAPDH PROTAC 16, PROTAC 1, PROTAC 2**

---

40 kd—

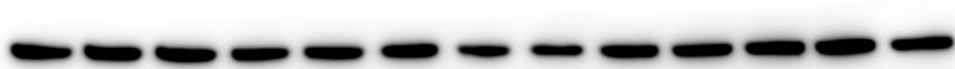

**GAPDH PROTAC 5, PROTAC 4, PROTAC 3**

---

40 kd—

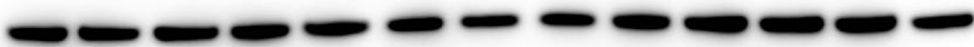

**GAPDH PROTAC 8, PROTAC 7, PROTAC 6**

---

40 kd—

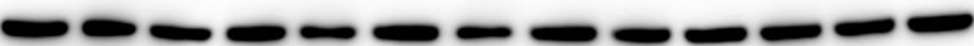

**GAPDH PROTAC 9, PROTAC 10, PROTAC 11**

---

40 kd—

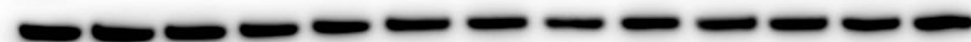

**GAPDH PROTAC 13, PROTAC 14, PROTAC 15**

---

40 kd—

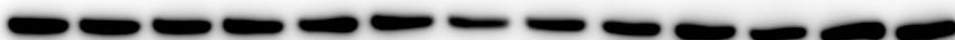

**GAPDH PROTAC 12, Fulvstrant**

---

40 kd—

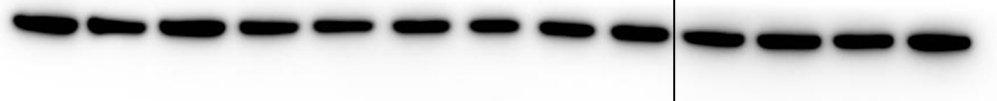

Not related in this article

**Supplementary Fig.8.** Unprocessed blots related to Supplementary Fig. 3b. Protein marker (Thermo Scientific™, #26616) was used. Membranes were cropped according to the molecule weight of ER and  $\beta$ -actin before exposure.

**T-47D cell line**

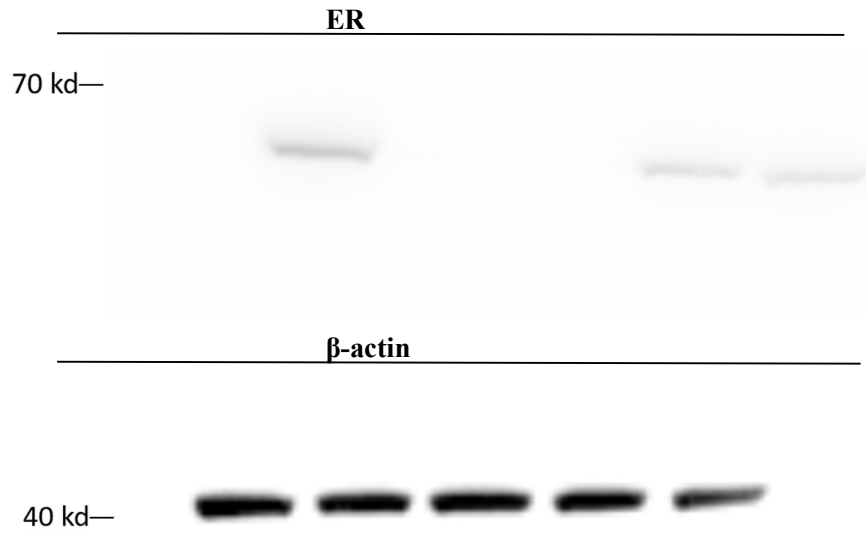

**Supplementary Fig.9.** HRMS spectrometry data of ER PROTACs.

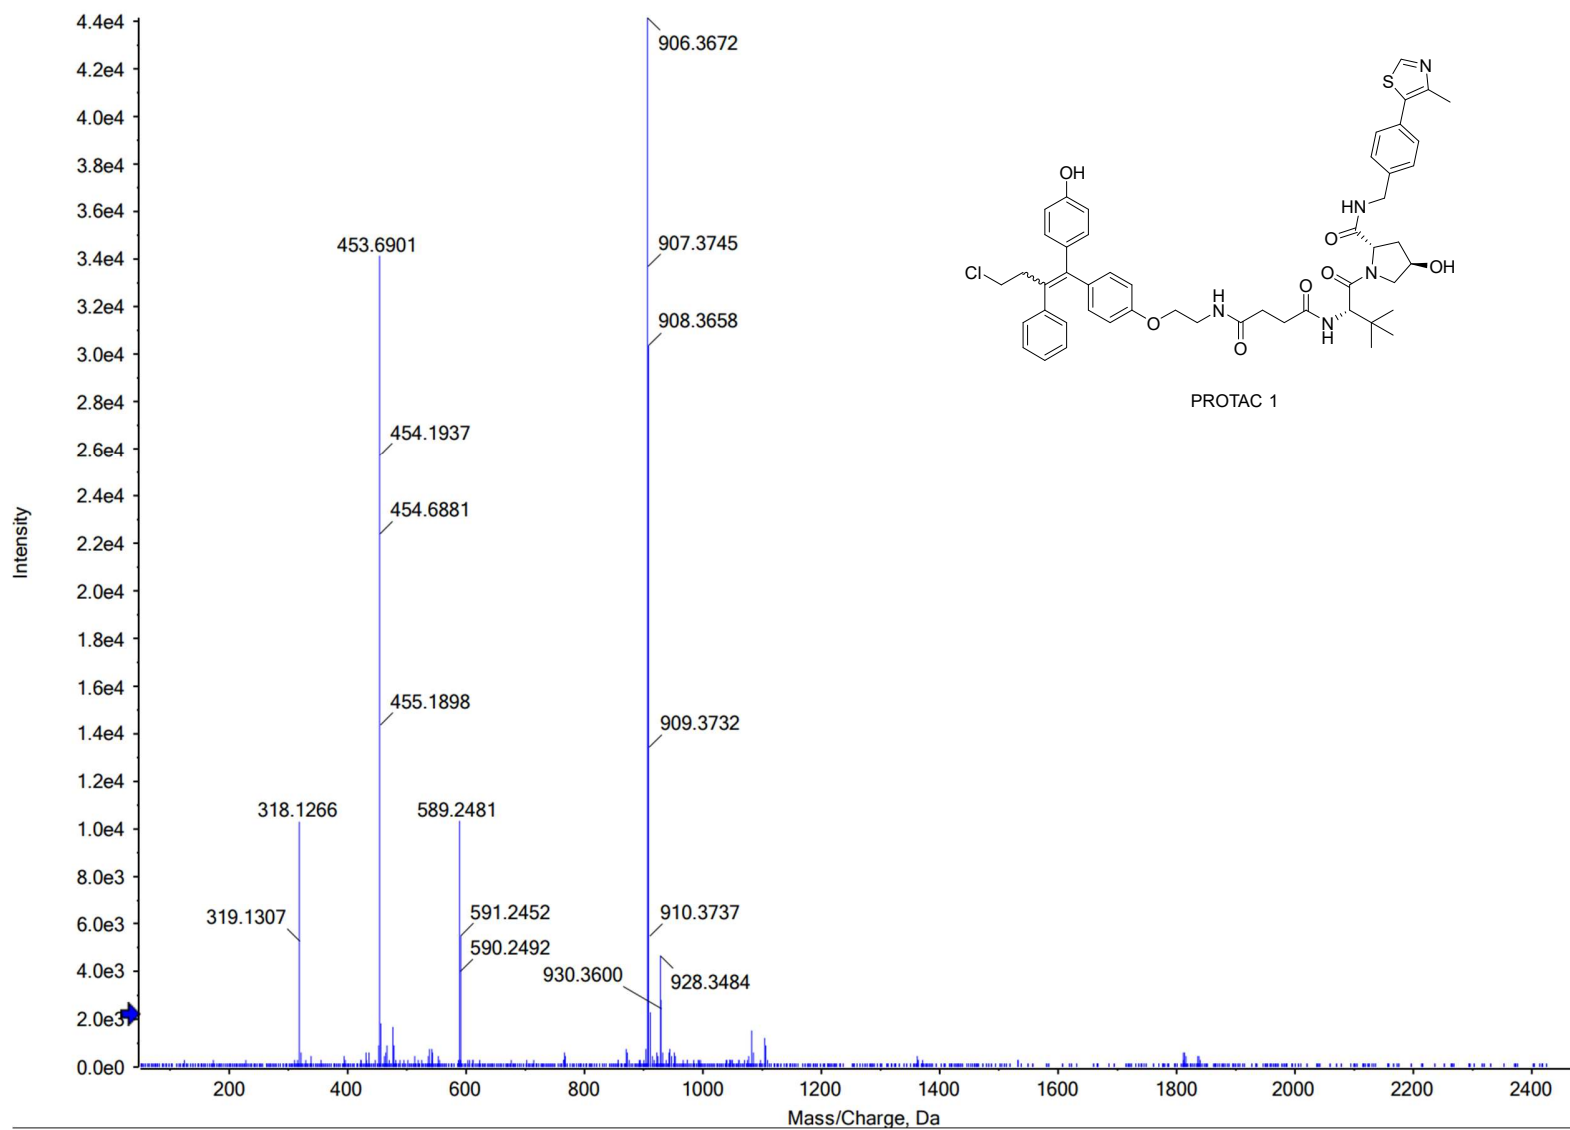

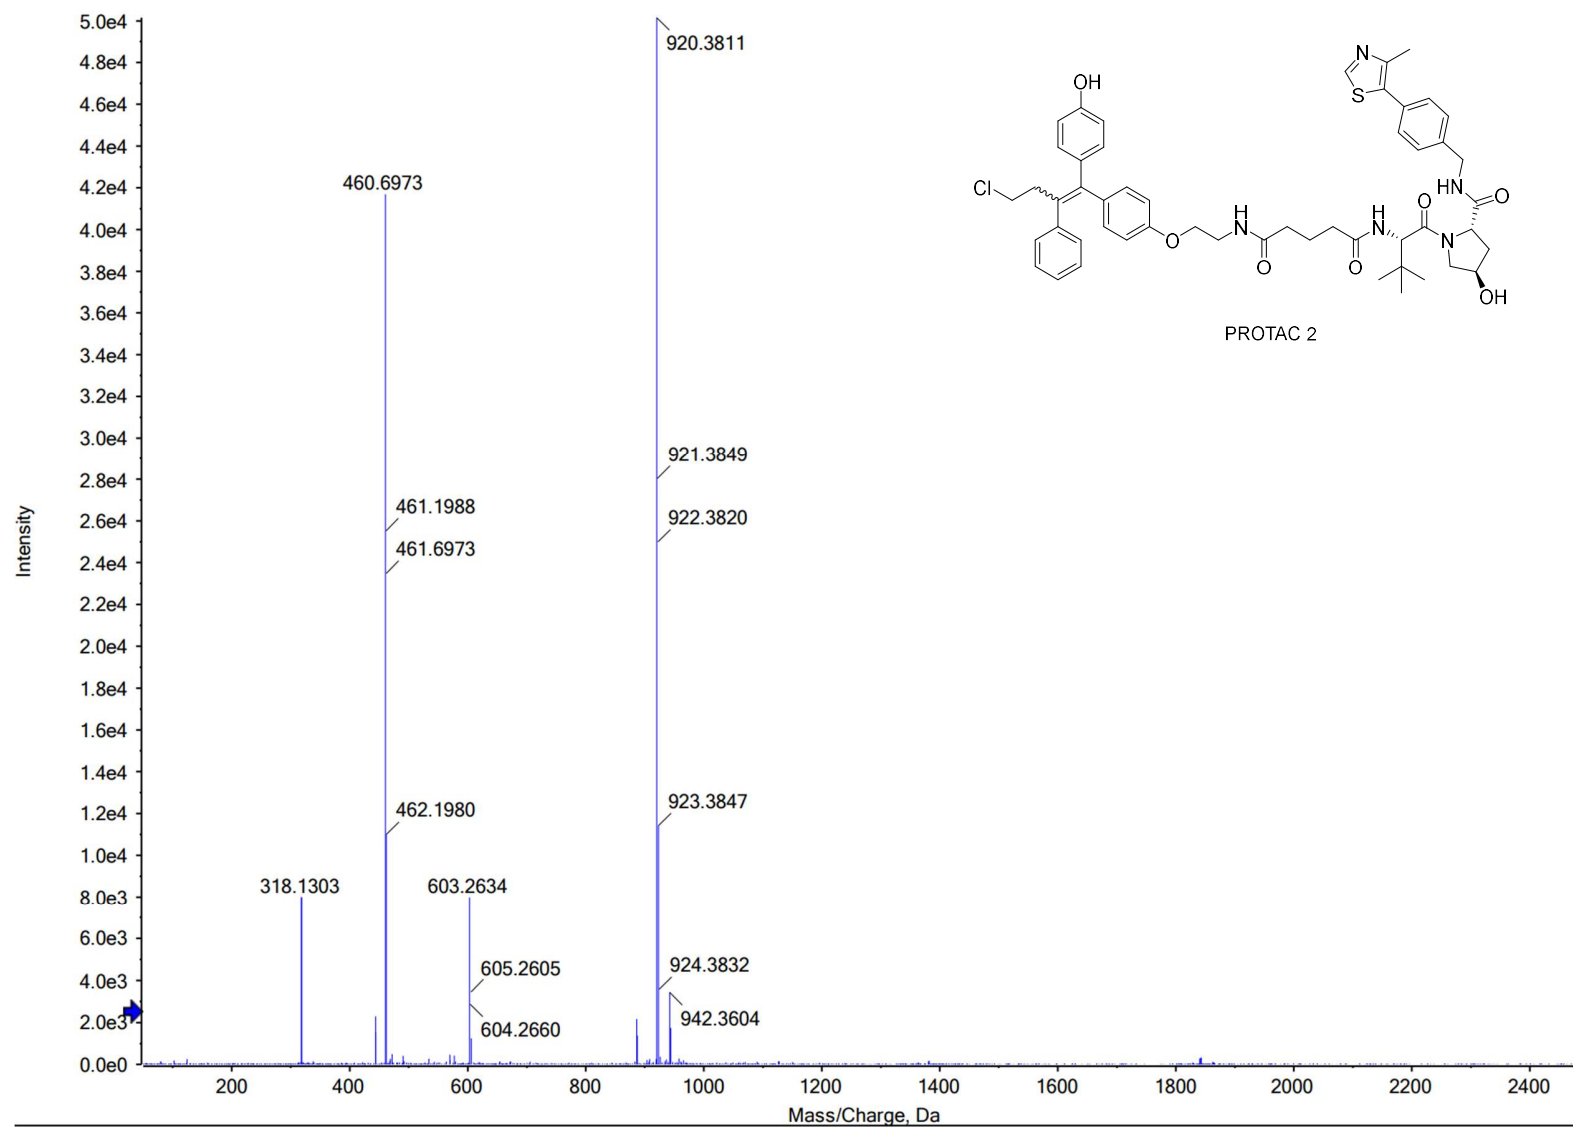



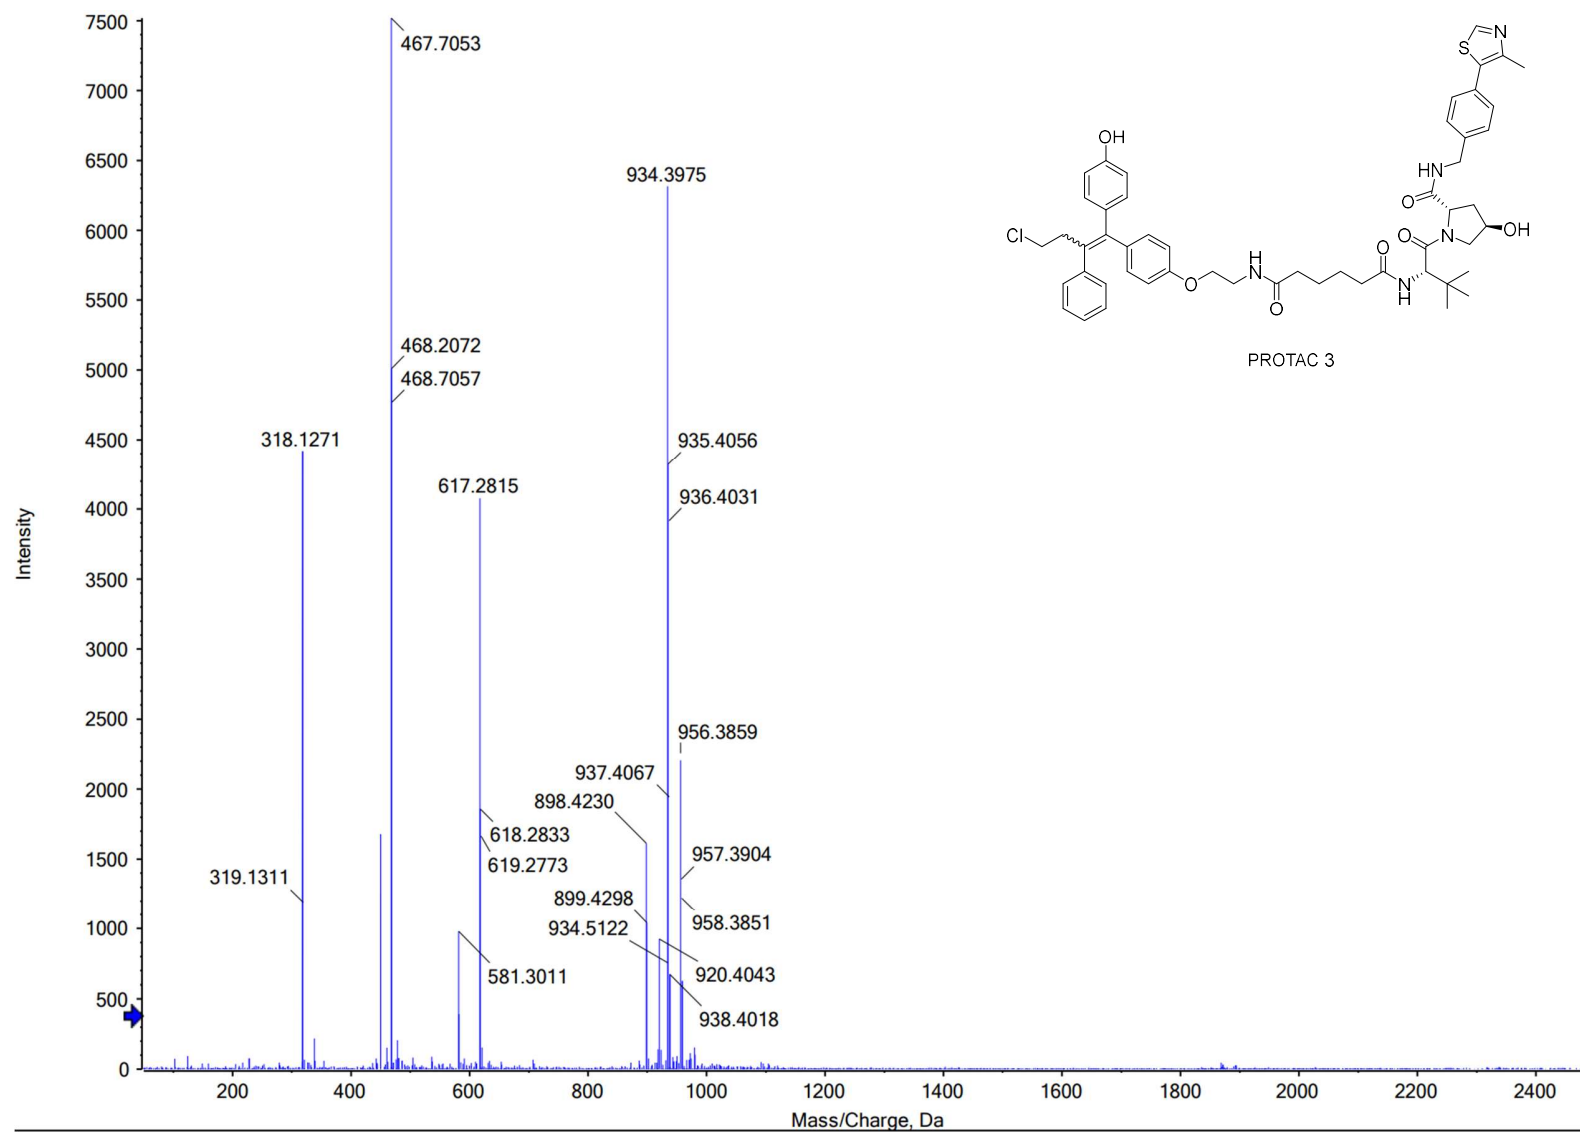

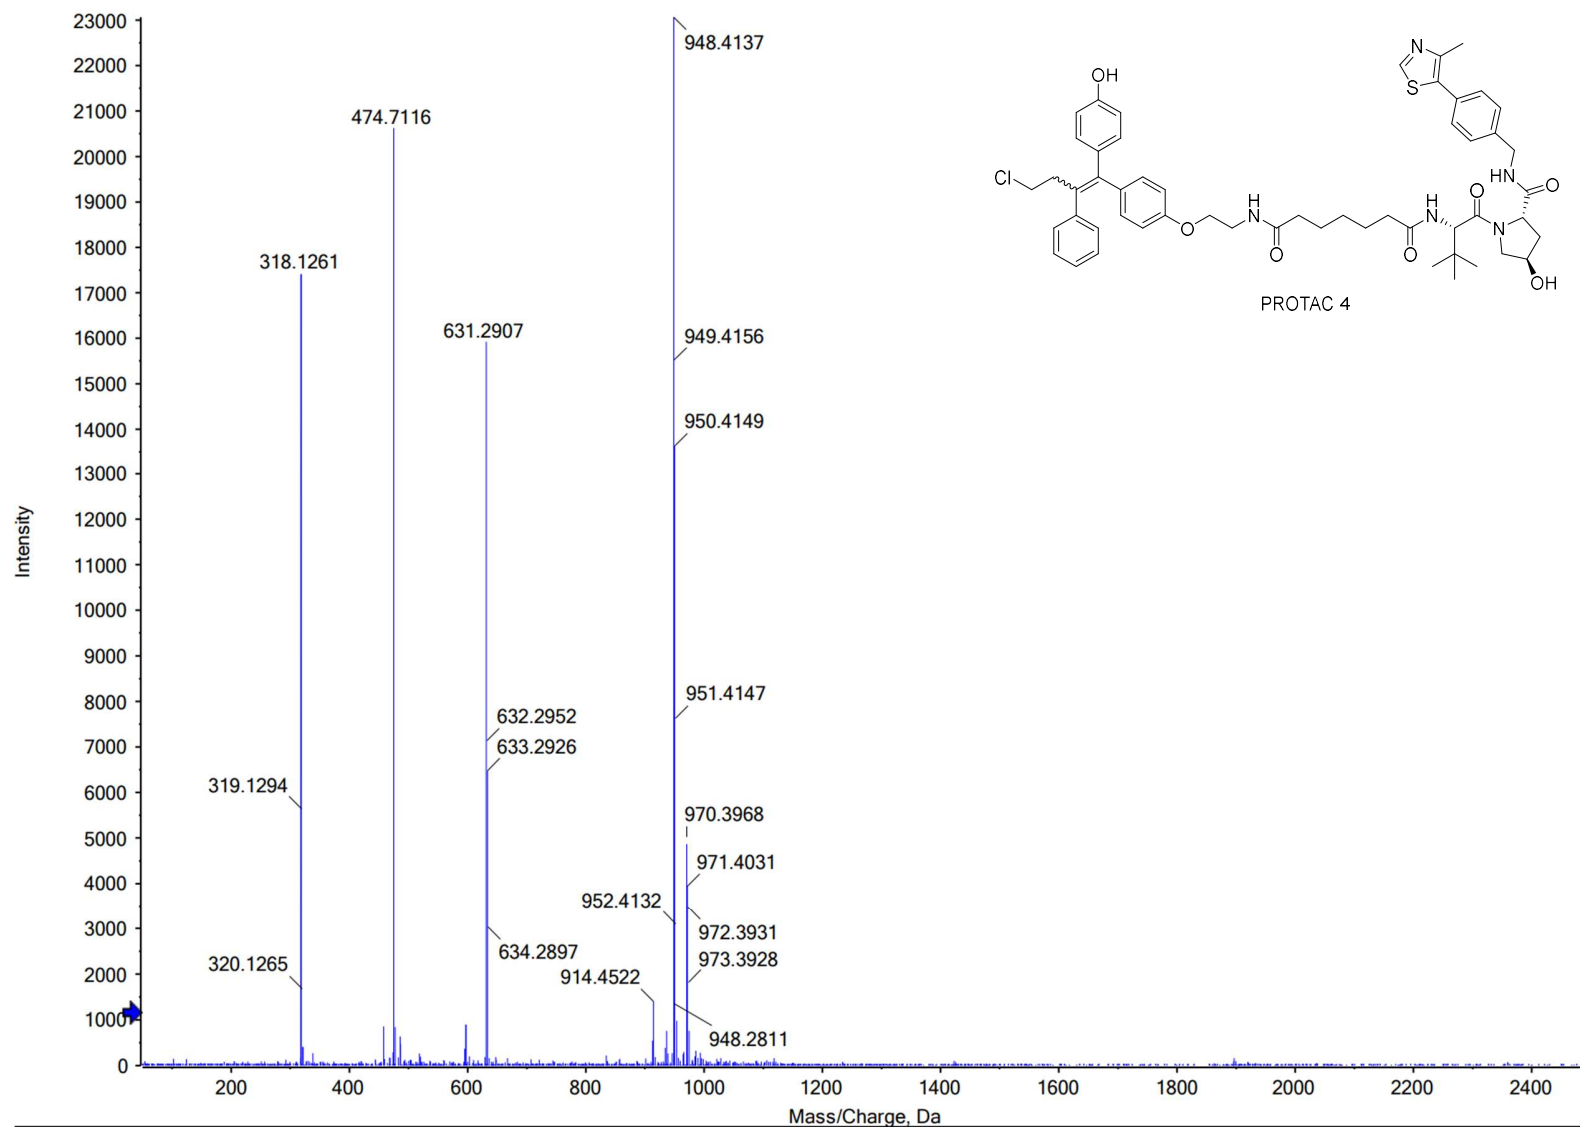

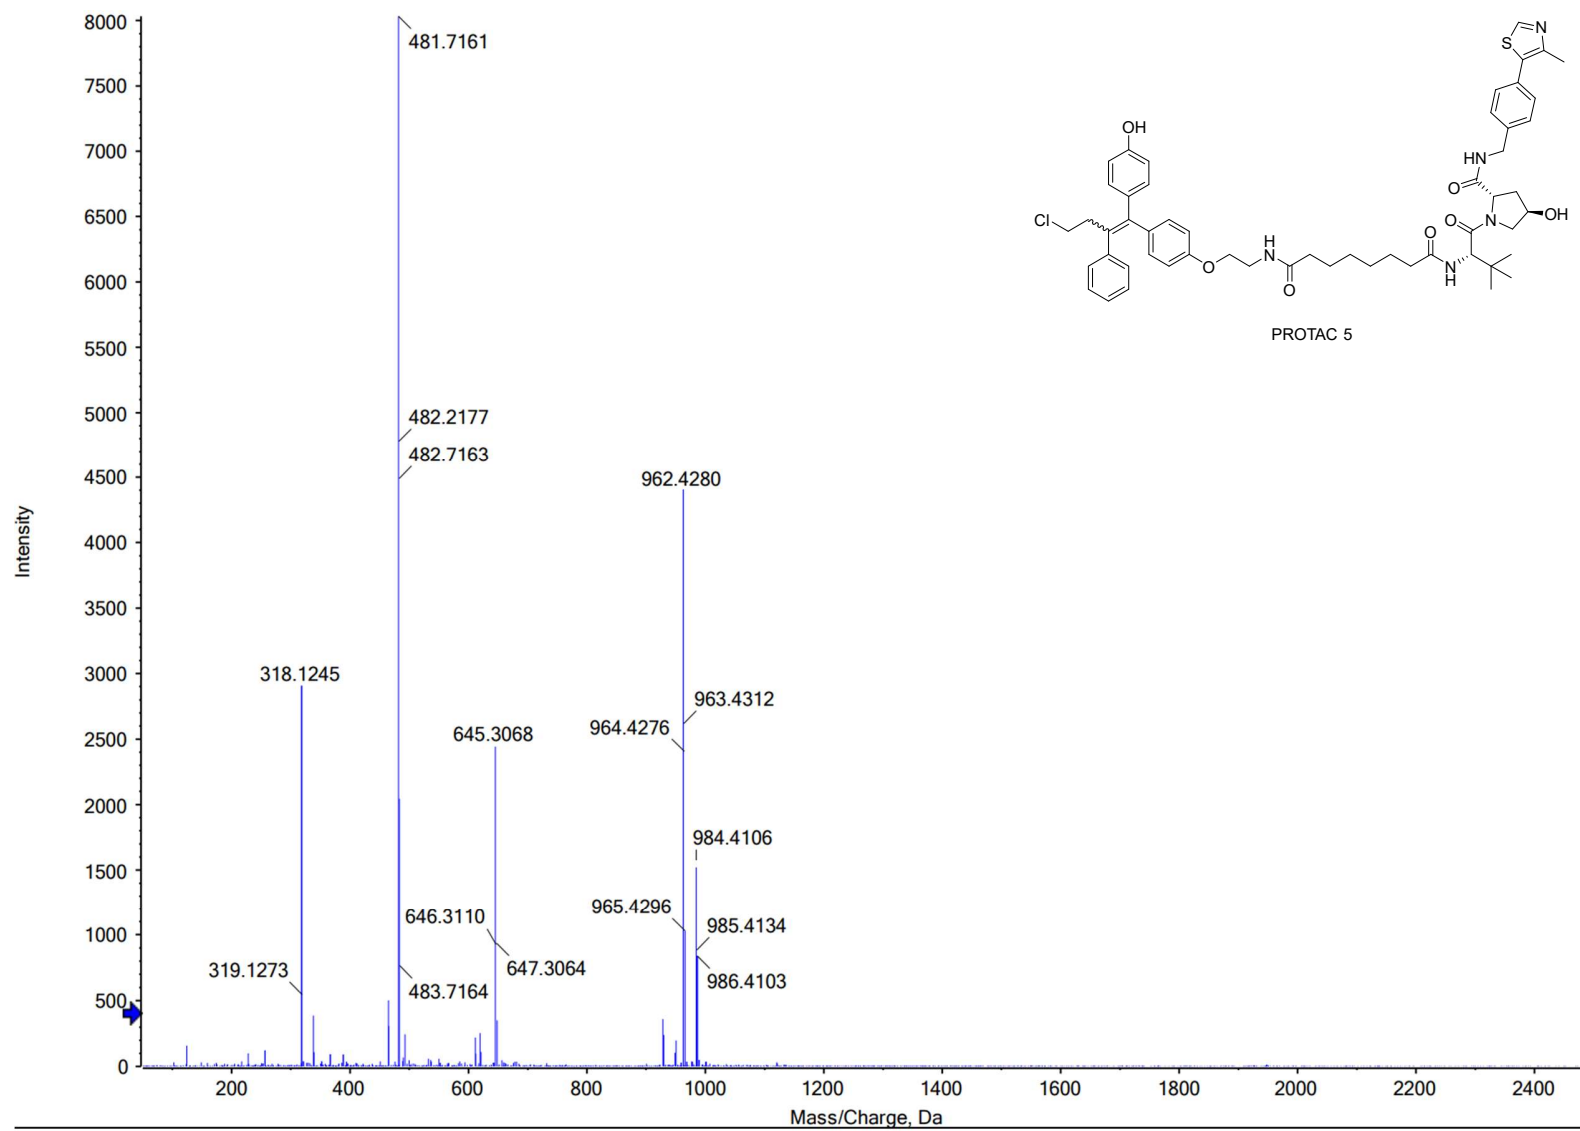

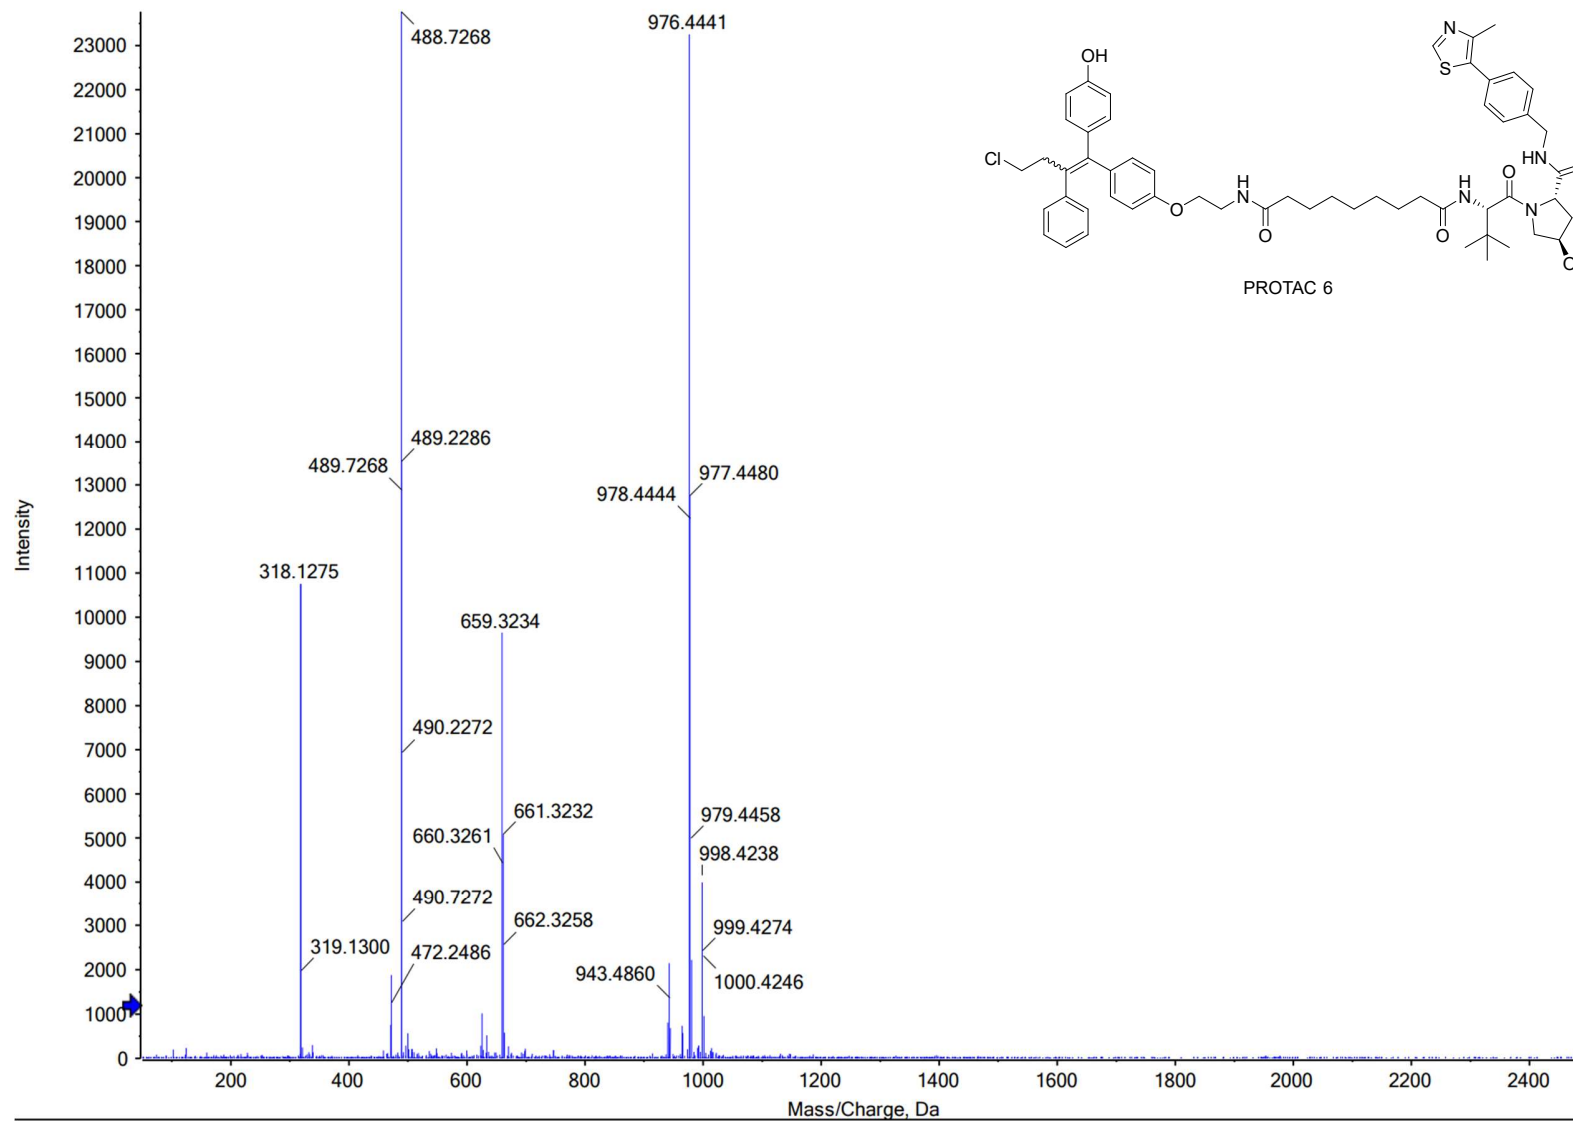

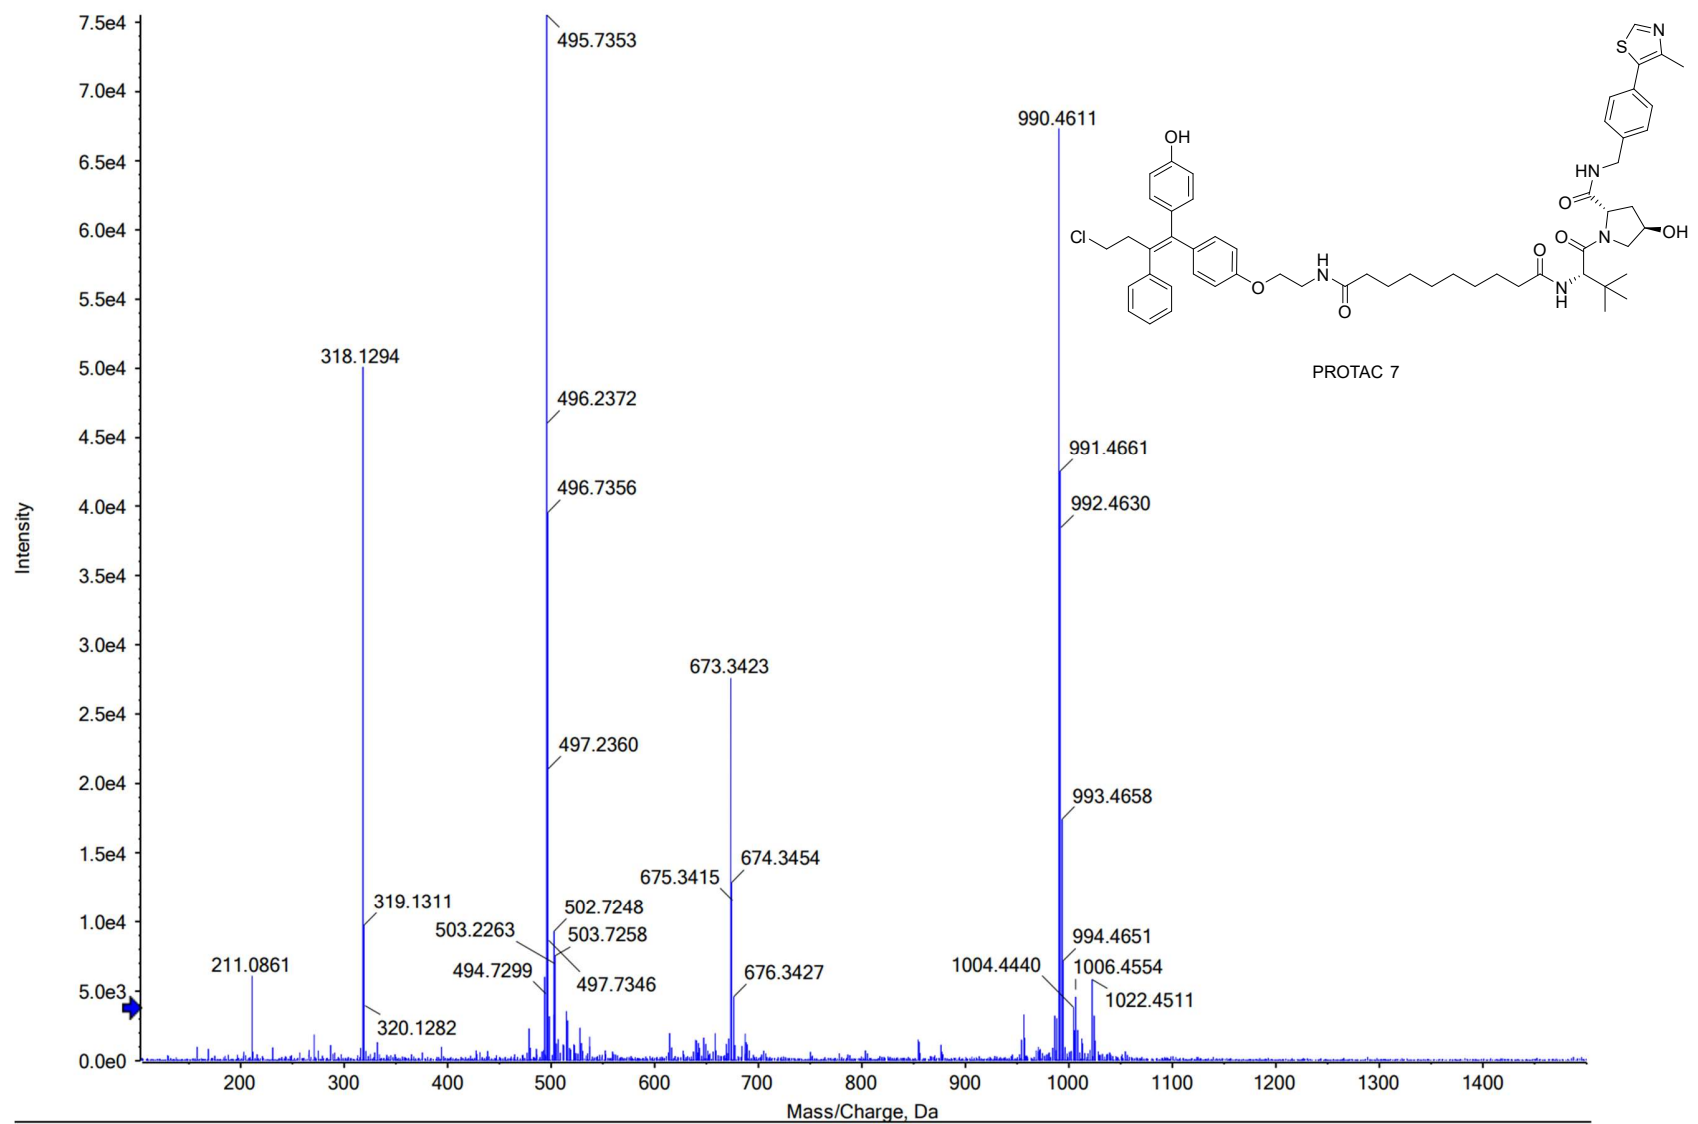

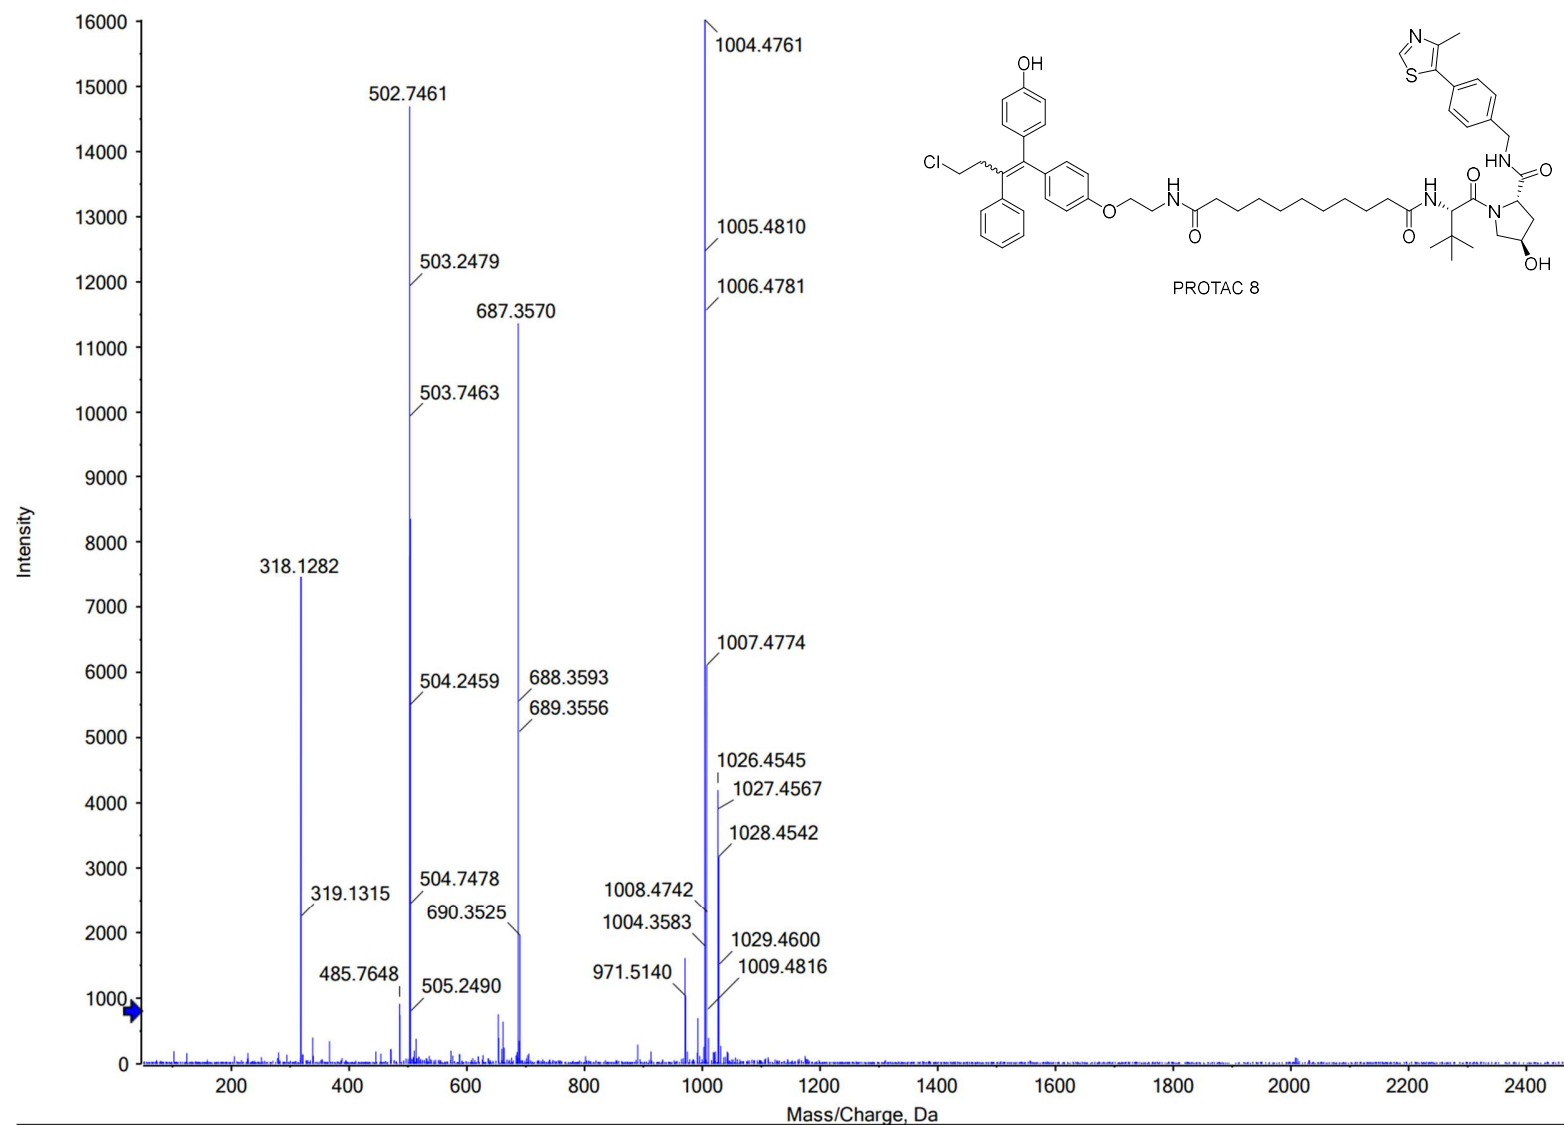

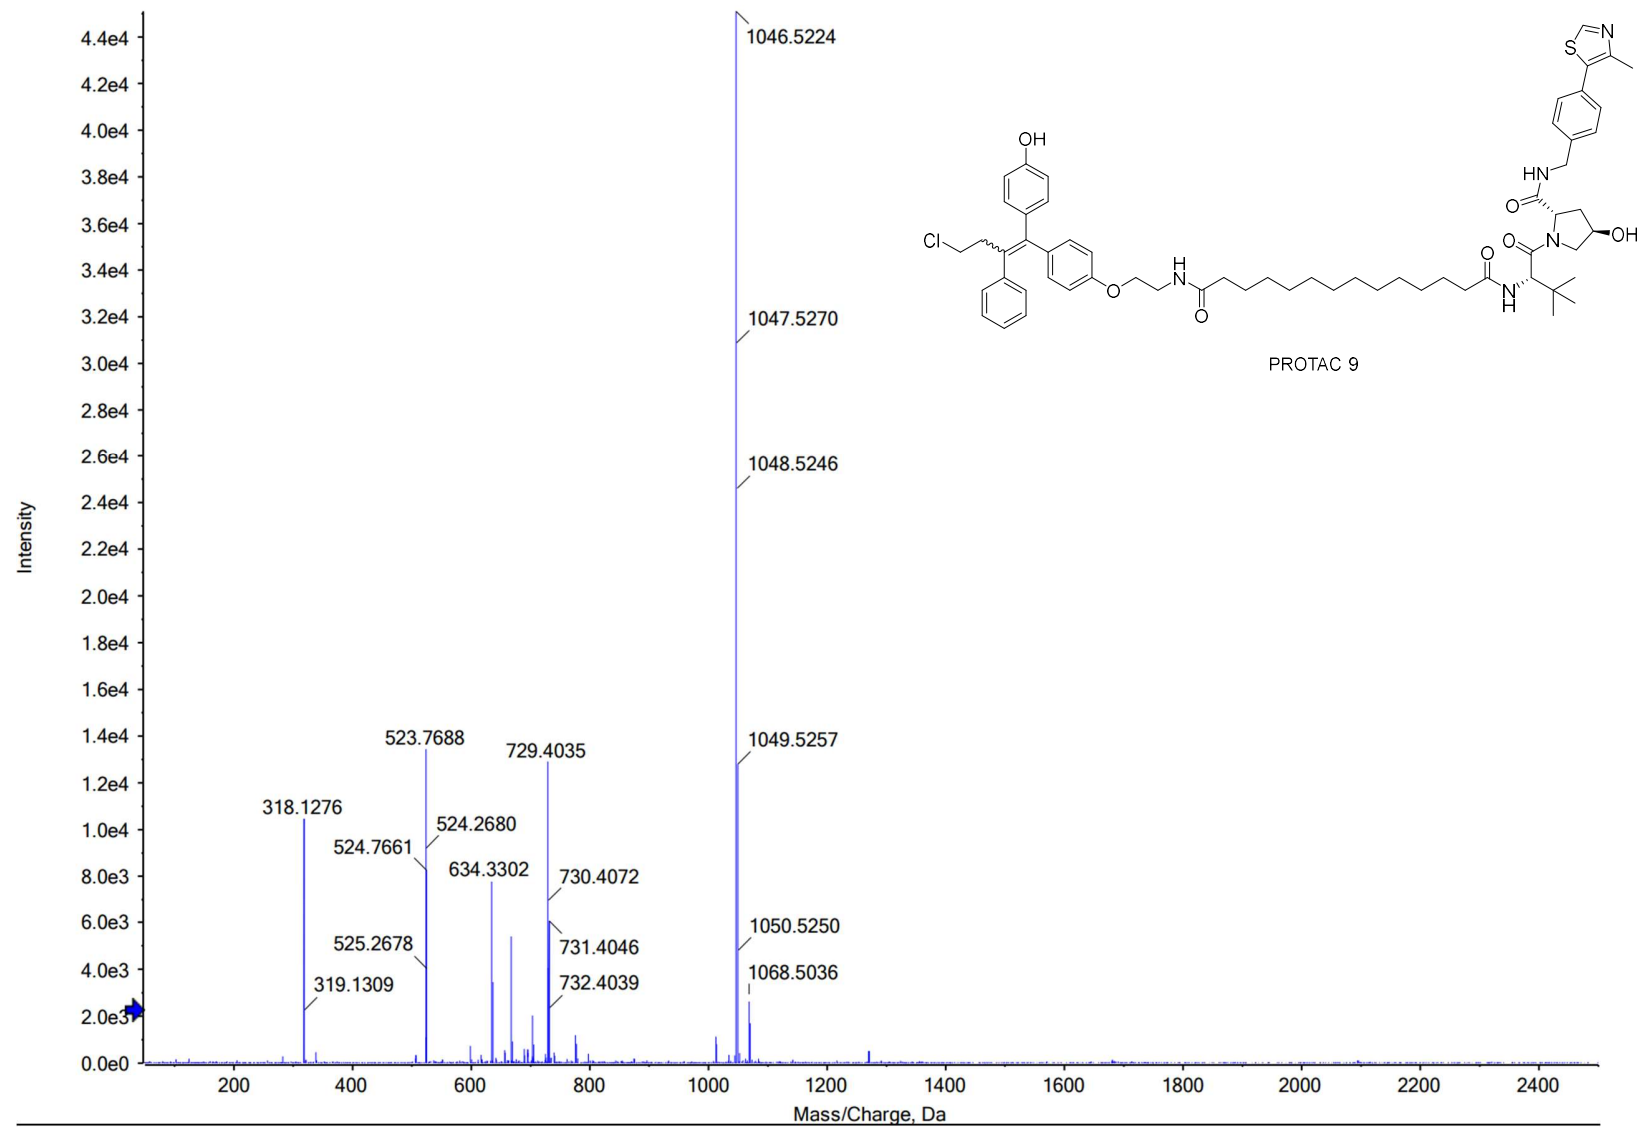

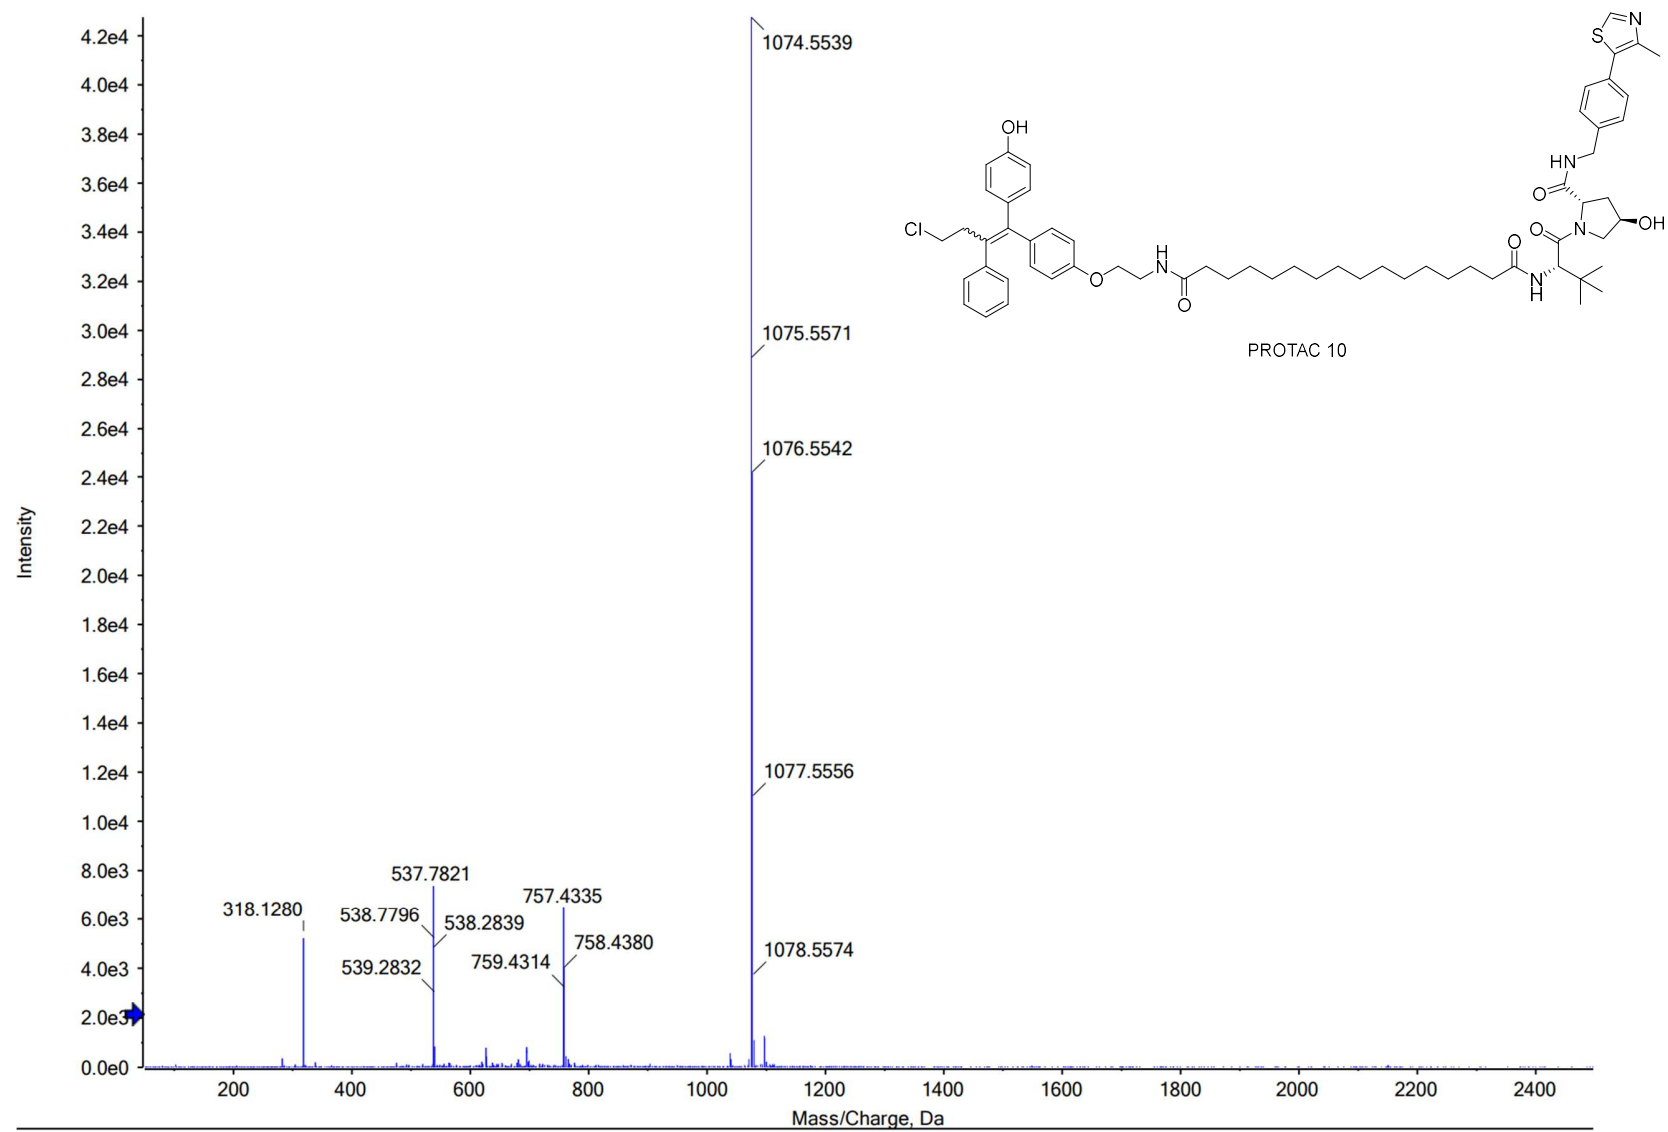



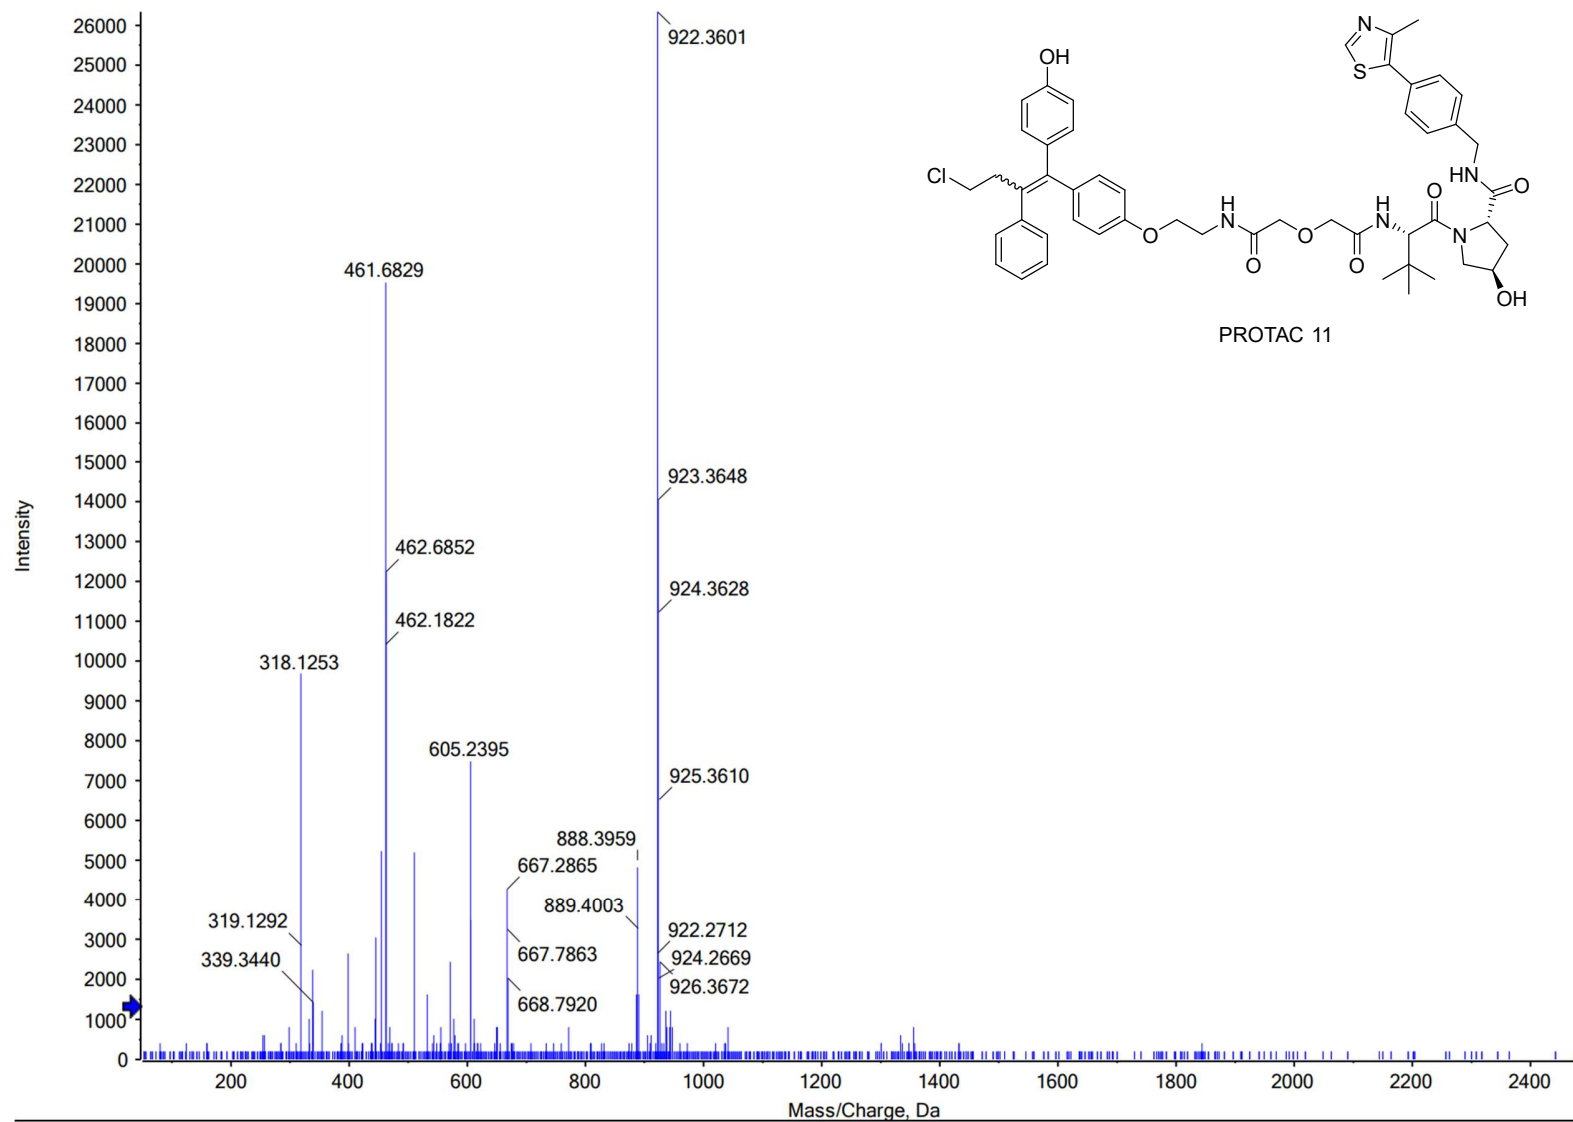

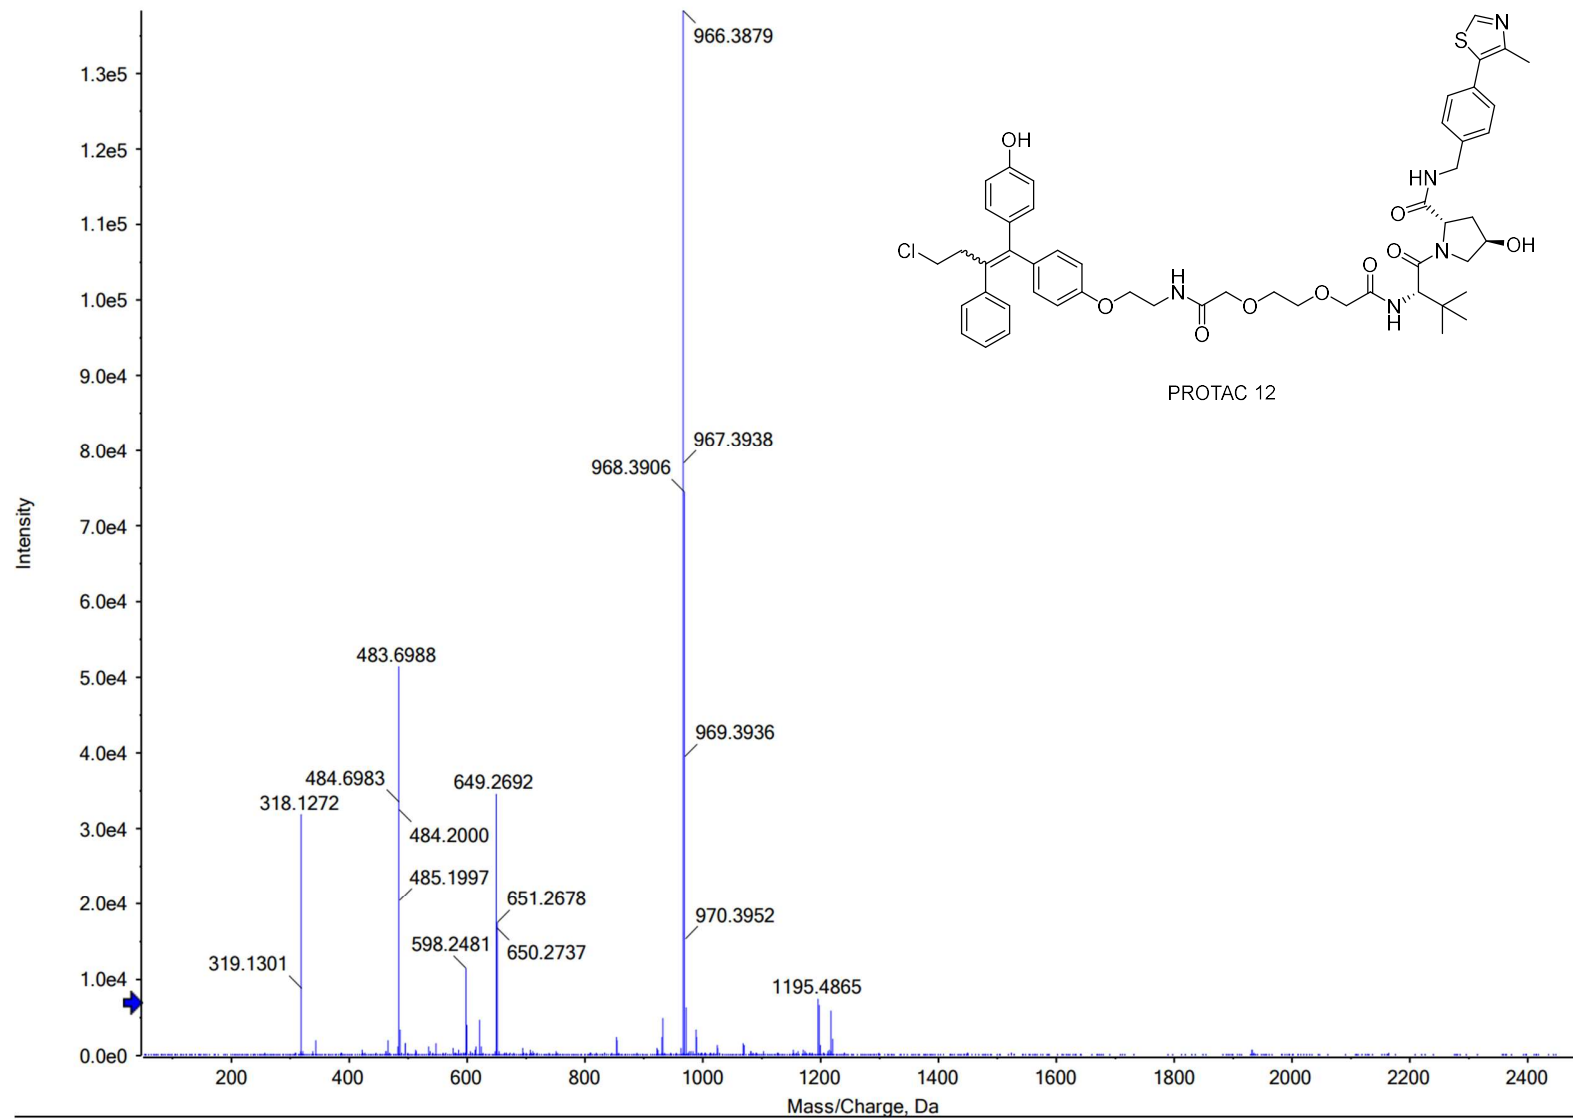

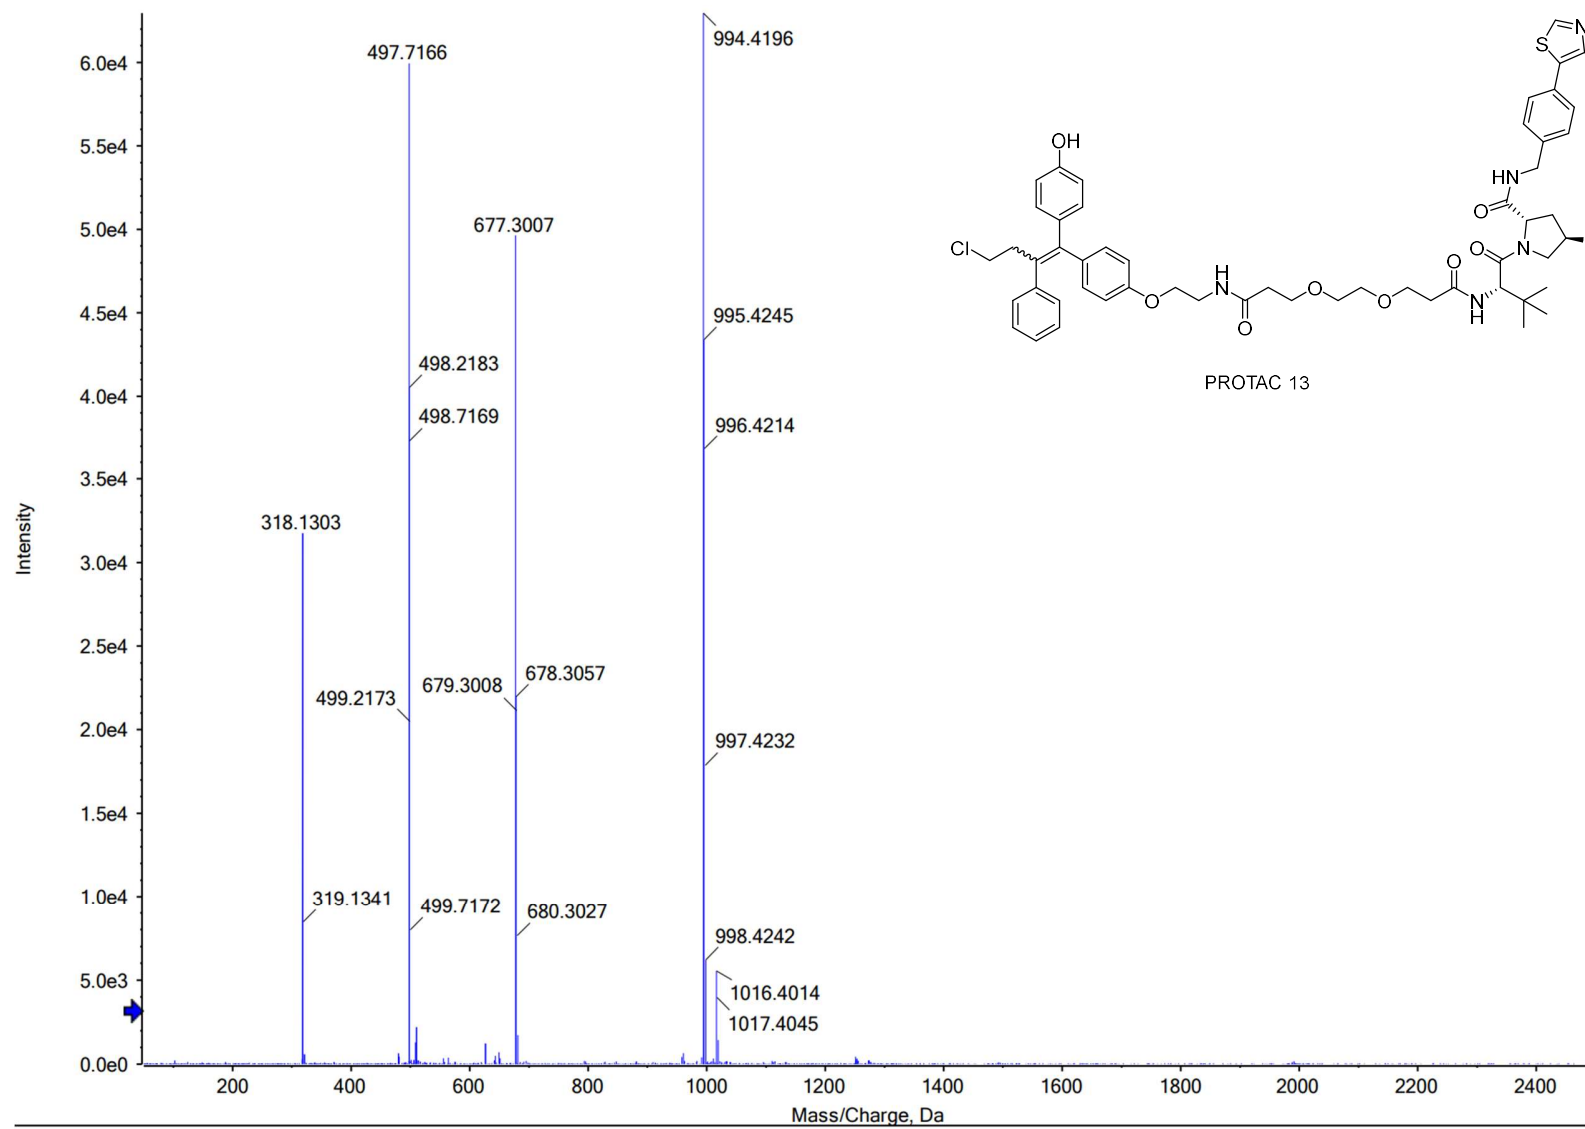

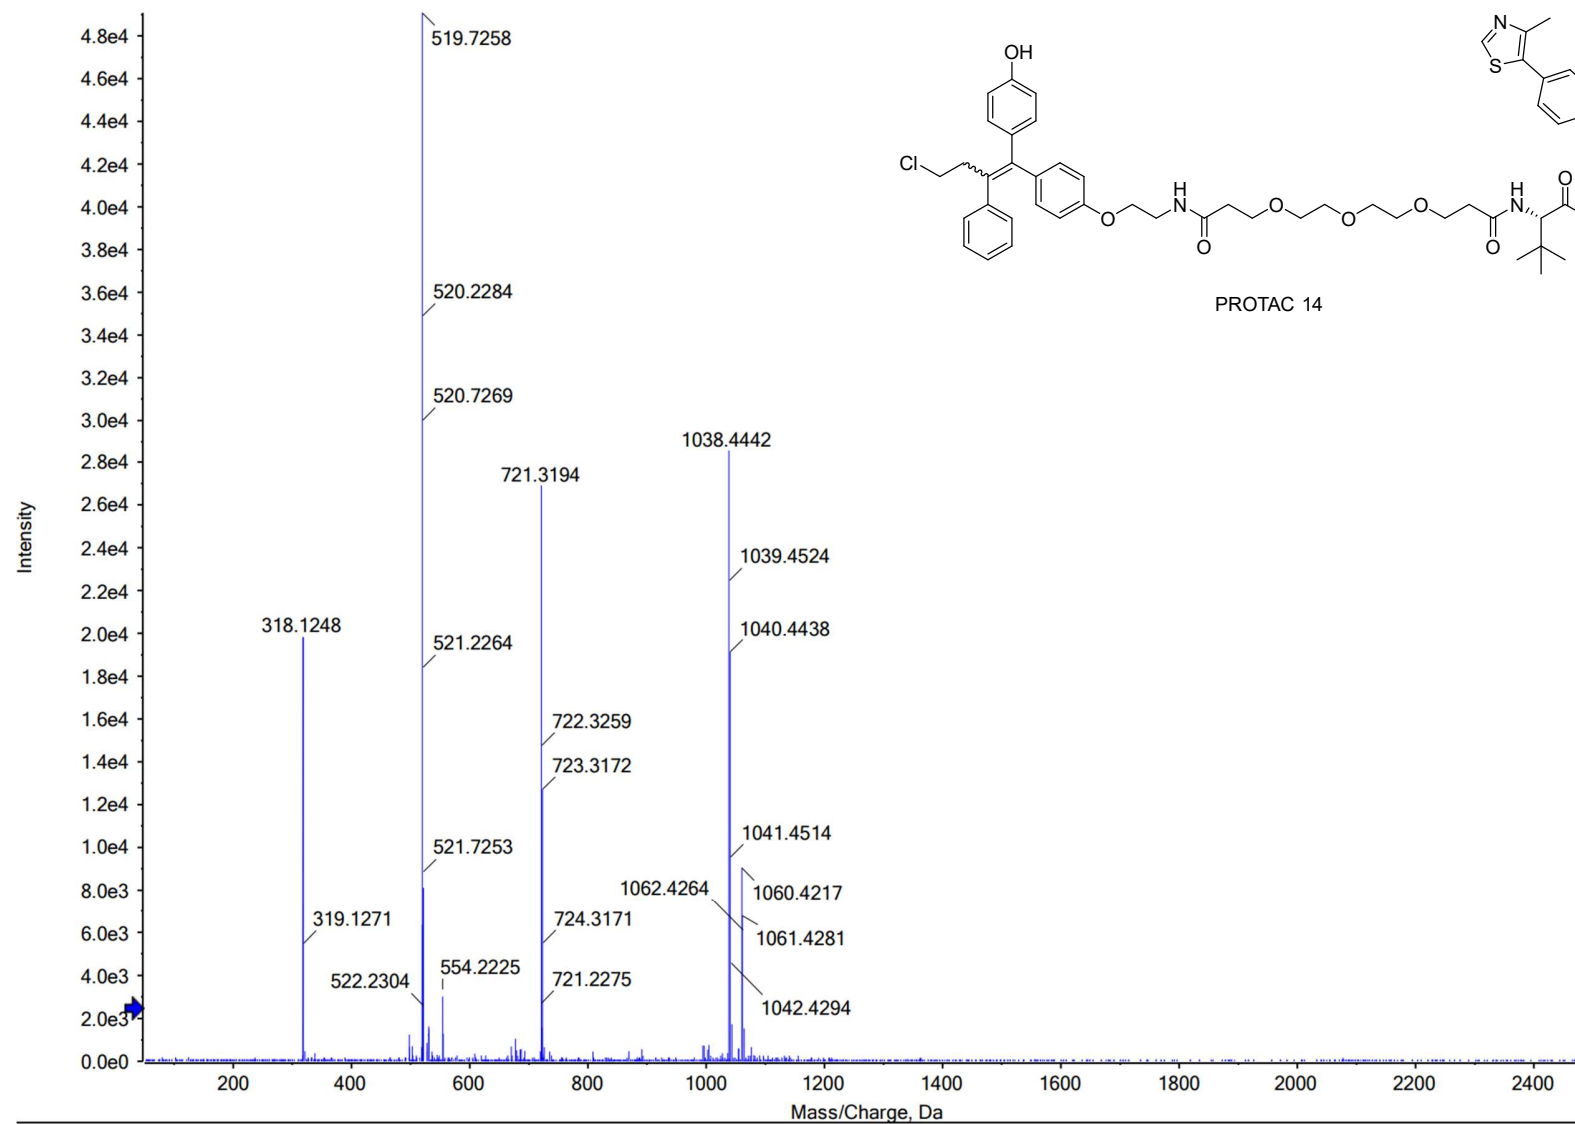

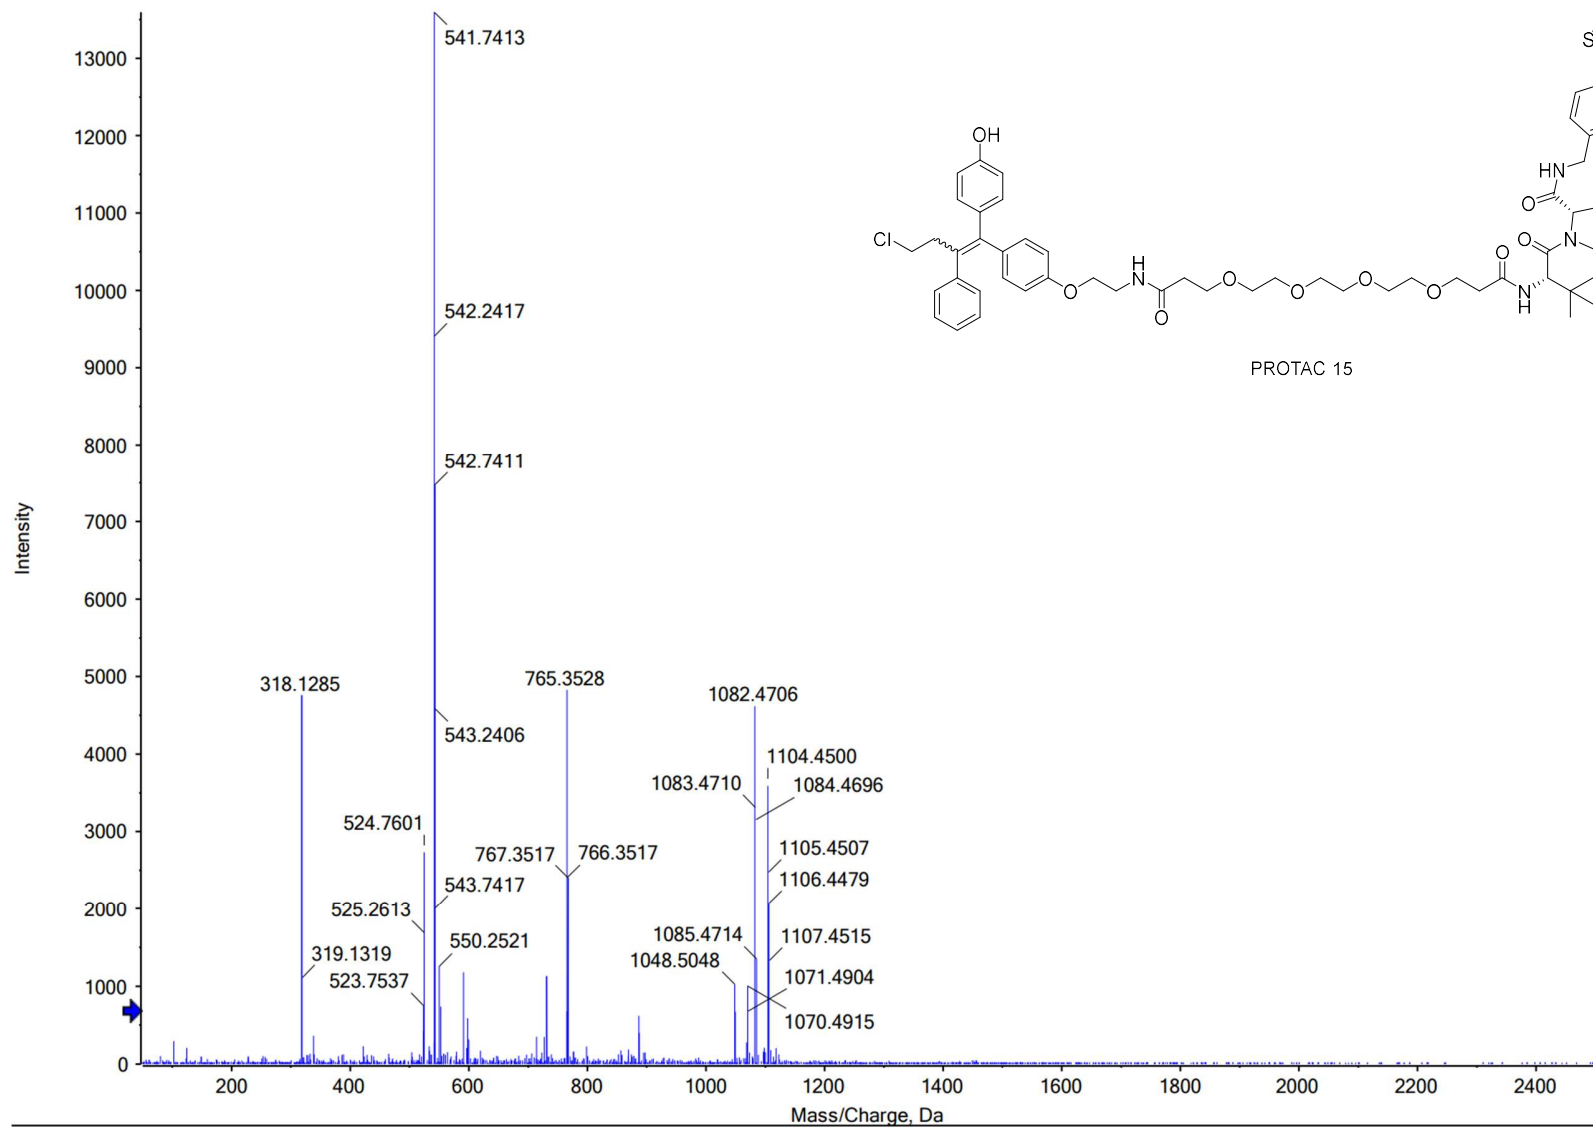

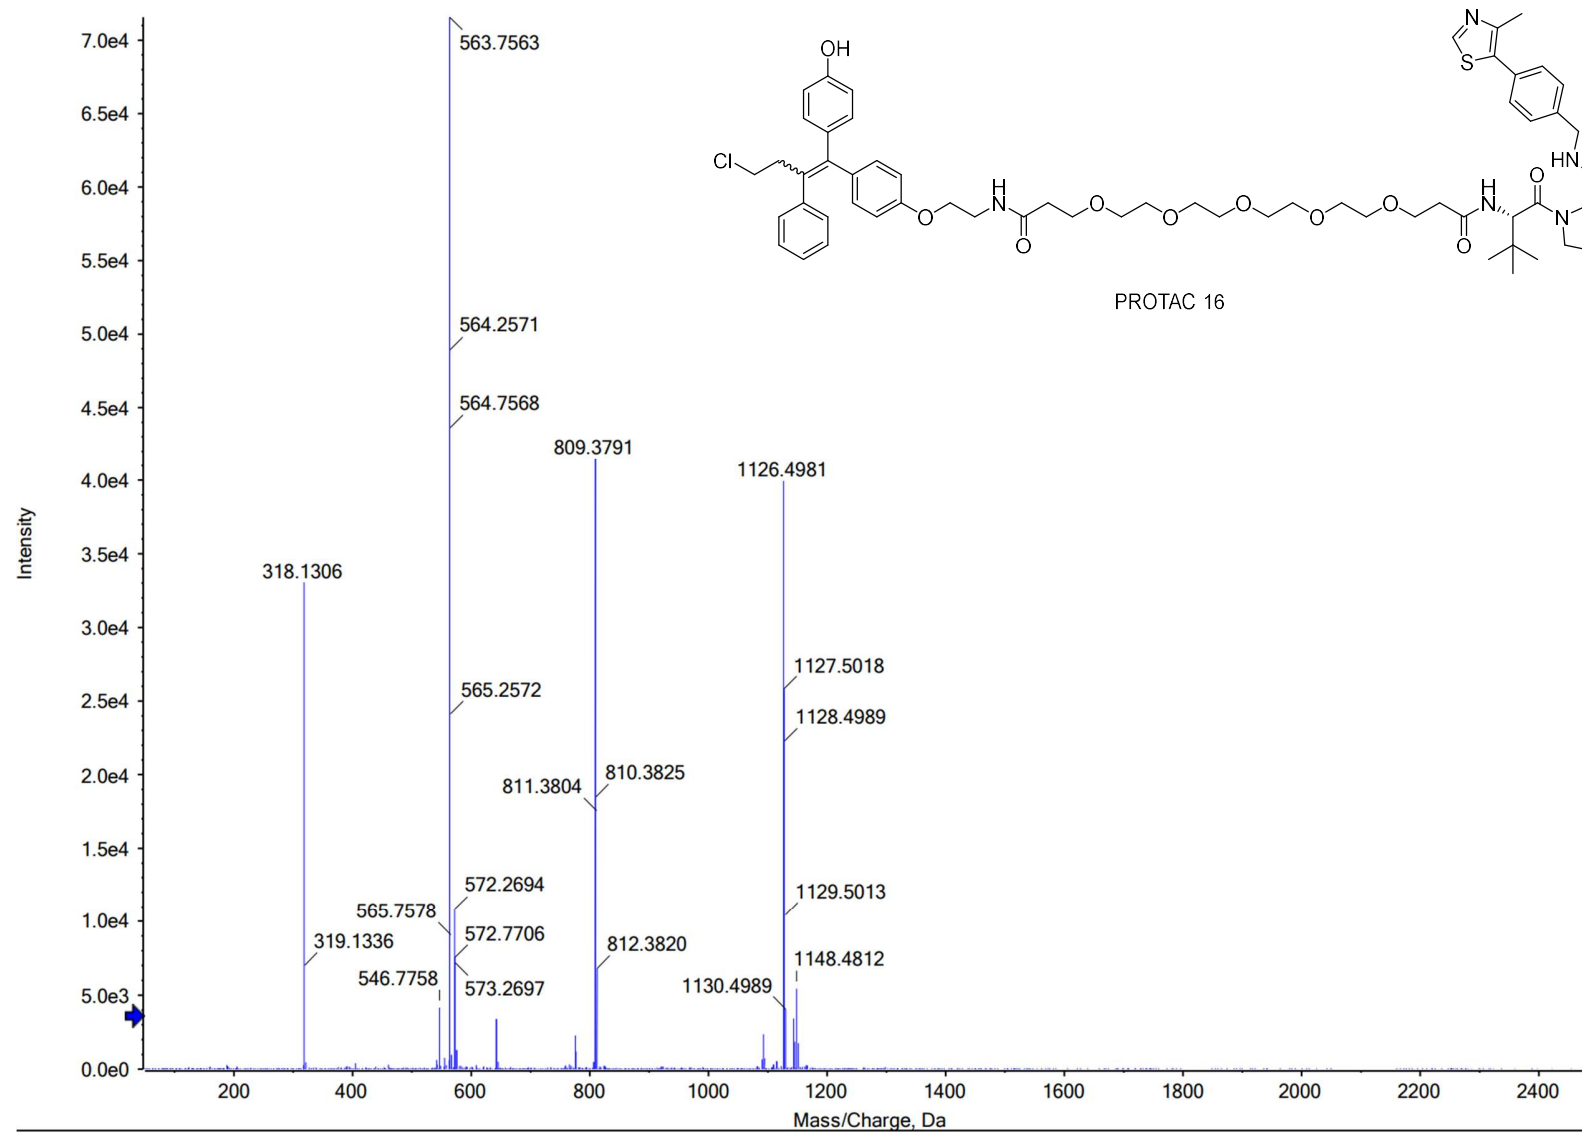

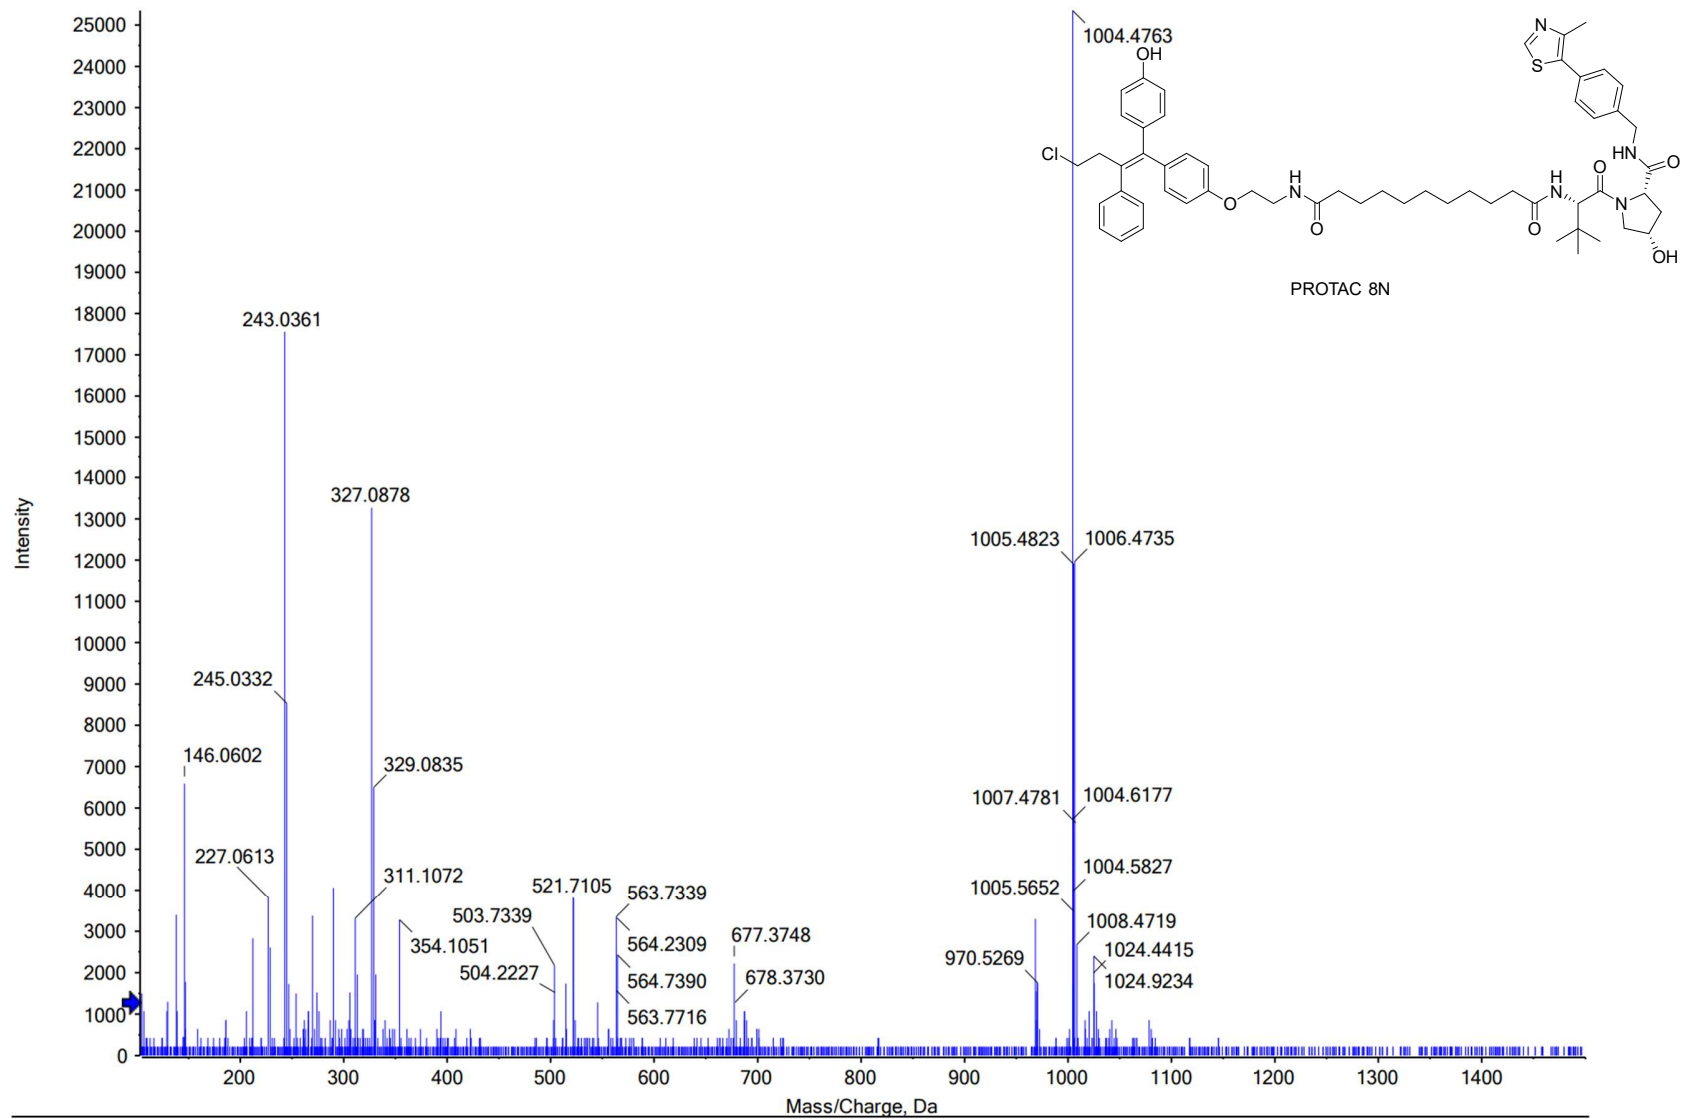

Supplement: 41467_2022_34807_MOESM1_ESM.pdf [file 41467_2022_34807_MOESM1_ESM.pdf]
